# Supplementary material for: meaRtools: An R package for the analysis of neuronal networks recorded on microelectrode arrays
Source: PLoS Comput Biol. 2018 Oct 1;14(10):e1006506. doi: 10.1371/journal.pcbi.1006506 (PMC6181426; doi:10.1371/journal.pcbi.1006506)
Supplement: S1 Table — (XLSX) [file pcbi.1006506.s002.xlsx]

## Sheet: supplementary table S1
S1 Table
Primary IGM.MEA functions
	Load MEA recordings
	function	input	output
	read_spikelist	spike_list.csv table	Spikes R object
	Extract features
	function	input	output
Spikes	calculate_spike_features	Spikes R object	Spikes R object
STTC	compute_mean_sttc_by_well
entropy	calculate_entropy_and_mi
mutual information
Bursts	calculate_burst_features
Network spikes	calculate_network_spikes
Network bursts	calculate_network_bursts
Probability distributions	calc_burst_distributions
	Combine recordings
	function	input	output
Spikes, Bursts, Network spikes, Network bursts	aggregate_features	Spikes R object	aggregated feature tables
Probability distributions	calc_burst_distributions	Spikes R object	distribution.csv tables
	Compare print and plot differences between genotypes and/or treatments
	function	input	output
Spikes, Bursts, Network spikes, Network bursts	write_features_to_files	aggregated feature tables	feature output files, csv format
	permute_features_and_plot	Spikes R object, aggregated feature tables	plots and test results, pdf format
Probability distributions	dist_perm	distribution.csv tables
