# Supplementary material for: meaRtools: An R package for the analysis of neuronal networks recorded on microelectrode arrays
Source: PLoS Comput Biol. 2018 Oct 1;14(10):e1006506. doi: 10.1371/journal.pcbi.1006506 (PMC6181426; doi:10.1371/journal.pcbi.1006506)
Supplement: S2 Table — (XLSX) [file pcbi.1006506.s003.xlsx]

## Sheet: supplementary table S2
S2 Table
Input spike_list.csv file
General information		spike time from start of recording	electrode name: well name_electrode position	Amplitude(mV)
Investigator		Time (s)	Electrode	Amplitude(mV)
Experiment ID		0.01	E3_13	0.122739
Description		0.0104	E3_34	0.0404512
		0.01112	E3_42	0.0266753
Maestro Settings		0.01152	E3_33	0.0347905
Original File Time	2015-08-17 16:12:00	0.01216	E3_41	0.0297472
Sampling Frequency	12500 Hz	0.01224	E3_23	0.0722354
Voltage Scale	6.5E-08 V/sample	0.01272	E3_13	0.080153
Experiment Start Time	2015-08-17 16:11:00	0.0132	E3_34	0.0656024
Referencing Method	FpgaMedian	0.01376	E3_22	0.0225521
Analog Mode Setting	Neural Spikes	0.01432	E3_43	0.0285527
Plate Type	Maestro 48-Well (Transparent)	0.01448	E3_23	0.0876106
Digital Low Pass Filter	None	0.01456	E3_41	0.0645337
Digital High Pass Filter	5 Hz IIR	0.01536	E3_13	0.0714678
Temperature Set Point	37.0 Degrees C	0.01536	E3_31	0.0280746
Current Temperature	37.0 Degrees C	0.01568	E7_31	0.0309395
Heater Power	On	0.01592	E2_14	0.0326887
AxIS Version	2.0.3.3	0.01608	D7_14	0.0801025
MiddleMan Firmware	2.0.3.3	0.0168	E3_41	0.0497012
Maestro Firmware	2.0.3.3	0.01688	B2_13	0.0479878
		0.01704	C7_12	0.0566423
File Source	OptoWT_20150802_A32_DIV18exci(000).raw	0.0184	E2_24	0.257762
Recording Offset from File Start	3m1s	0.01888	E2_34	0.031346
		0.01912	E3_13	0.210721
Requested File Section	0s to 18m2s	0.01928	E3_41	0.0361502
Actual File Section Run	0s to 18m2s	0.01936	B2_33	0.0592491
		0.02072	E3_33	0.0330442
Digital Filter Settings		0.02136	E3_43	0.0453883
High Pass Filter	Butterworth	0.02152	E3_13	0.0701084
High Pass Poles	1	0.0216	E3_41	0.0443003
High Pass Cutoff Freq.	3000 Hz	0.02192	E2_42	0.0344628
Low Pass Filter	Butterworth	0.02248	E3_34	0.0717721
Low Pass Poles	1	0.02264	E3_23	0.029631
Low Pass Cutoff Freq.	200 Hz	0.02376	E3_13	0.0740371
		0.02432	E3_31	0.057427
Spike Detector Settings		0.0248	E3_11	0.0401791
Method	Adaptive Threshold Crossing	0.02496	E6_31	0.0832826
Threshold	7	0.0252	E3_34	0.0399346
Threshold Status	Variable	0.02544	E6_41	0.0633425
Pre-Spike Duration	0.84 ms	0.02616	E2_21	0.0389422
Post-Spike Duration	2.16 ms	0.02632	E3_23	0.038357
Allow Sample Overlap	FALSE	0.02648	E3_41	0.0506099
Spike Count Interval	1 s	0.02664	E2_14	0.0238493
		0.02728	E3_13	0.0944171
		0.02728	C6_12	0.0387451
		0.02744	E3_34	0.0241753
		0.0276	E2_22	0.07327
		0.02768	C6_41	0.0244851
		0.02768	E6_12	0.0391157
		0.02792	C6_31	0.0428557
		0.02896	E3_33	0.0461243
		0.02936	E2_24	0.249304
		0.02976	E3_41	0.0509624
		0.03008	E6_31	0.044915
		0.03048	E3_13	0.0695202
		0.0312	E2_32	0.021126
		0.03152	E6_41	0.0451318
		0.03176	E3_23	0.0896103
		0.03192	E2_24	0.0254044
		0.03216	E3_21	0.0314867
		0.03232	E3_43	0.0415544
		0.0324	E3_34	0.0376094
		0.03256	E6_23	0.050856
		0.0332	E3_13	0.10117
		0.03328	C6_42	0.0578101
		0.03344	E3_41	0.0476546
		0.03368	E3_31	0.0332657
		0.03368	E2_32	0.0366178
		0.03376	E3_42	0.0236839
		0.03456	C7_12	0.0707072
		0.03472	E3_33	0.0355319
		0.03544	E3_34	0.0472725
		0.0356	E3_13	0.0255417
		0.03568	C6_21	0.061257
		0.03576	E3_11	0.0525152
		0.03648	D7_14	0.0888419
		0.03696	B2_13	0.0456509
		0.03768	E2_14	0.0291279
		0.03784	E7_22	0.0231695
		0.03792	E3_13	0.0538113
		0.03816	E2_34	0.0283071
		0.0388	E3_41	0.0592758
		0.0388	E2_42	0.0256752
		0.03904	E3_34	0.0243185
		0.0392	E7_43	0.0486489
		0.04008	E3_13	0.0755763
		0.04024	B2_12	0.0624663
		0.0408	E2_34	0.0300662
		0.04096	E3_33	0.0268492
		0.04112	E3_31	0.0353052
		0.0412	E3_41	0.0511885
		0.04176	E2_14	0.0321046
		0.04176	E3_34	0.0422027
		0.04216	E7_34	0.047855
		0.04288	E3_23	0.0343343
		0.0432	E3_33	0.0500795
		0.0432	E3_13	0.0414541
		0.04344	E2_24	0.0492592
		0.04344	E3_31	0.0365608
		0.044	E3_43	0.0484063
		0.04408	E2_42	0.0320644
		0.04456	E7_43	0.0833386
		0.04464	B6_32	0.292492
		0.04504	C7_23	0.0654042
		0.04512	E3_23	0.0317976
		0.04544	E3_34	0.0461279
		0.04568	E3_13	0.0705077
		0.04608	E3_41	0.0538377
		0.04752	E7_31	0.0311277
		0.04792	E3_13	0.200844
		0.048	E3_34	0.126898
		0.04832	E3_41	0.0464869
		0.0484	C7_12	0.0752644
		0.0492	E7_24	0.0865142
		0.04968	E3_11	0.0438418
		0.04992	E2_22	0.0840919
		0.05008	E3_13	0.0522316
		0.0504	E3_34	0.022918
		0.05072	C7_34	0.053144
		0.05096	E2_14	0.0238152
		0.0528	E3_13	0.0674271
		0.05328	E6_31	0.0444311
		0.05408	E3_41	0.0620155
		0.05408	E7_31	0.0329115
		0.0548	B2_32	0.0517154
		0.05528	E3_31	0.0285158
		0.05528	E3_34	0.102024
		0.05528	E3_23	0.028651
		0.05536	E3_13	0.0701113
		0.05536	E3_33	0.0438149
		0.05608	E7_34	0.0630743
		0.0564	E2_24	0.26618
		0.0568	E3_32	0.0326724
		0.05696	E6_41	0.0499489
		0.05792	E3_13	0.0454787
		0.05792	E3_33	0.0326427
		0.05832	E3_34	0.0518822
		0.05848	E7_34	0.0508534
		0.05856	E3_42	0.0380501
		0.05864	E3_22	0.0231951
		0.0588	E3_43	0.0364134
		0.05976	E6_23	0.0430978
		0.06008	D7_43	0.0300887
		0.06032	E3_23	0.0697723
		0.06128	E3_13	0.199713
		0.06224	C6_12	0.0401633
		0.0624	B2_12	0.135555
		0.0632	E2_42	0.0272726
		0.06328	B2_13	0.0545805
		0.06376	E3_41	0.0865349
		0.06416	E2_14	0.0296123
		0.06432	B7_14	0.0332794
		0.06496	E3_11	0.0368465
		0.06512	E3_13	0.13099
		0.0664	E3_41	0.0283702
		0.06672	E7_23	0.209582
		0.06696	C6_13	0.0395893
		0.06704	E2_32	0.0246676
		0.06728	E2_34	0.0259736
		0.06736	E3_23	0.031955
		0.06744	E3_13	0.0826913
		0.06792	E3_31	0.0285532
		0.06832	B7_14	0.0301036
		0.06848	E3_43	0.0417371
		0.06848	C7_12	0.0648993
		0.0688	E3_33	0.0488081
		0.06888	E3_41	0.0682128
		0.06976	E3_34	0.0404045
		0.07016	E3_31	0.0227732
		0.0704	E7_24	0.0802795
		0.07104	E7_34	0.0506313
		0.072	E2_14	0.0251289
		0.07248	E2_42	0.0335366
		0.07296	E6_12	0.0407387
		0.07328	E3_13	0.0786595
		0.0736	B2_33	0.0597
		0.07368	E3_31	0.0232355
		0.07424	C6_21	0.0577165
		0.07504	E2_24	0.12644
		0.0752	E2_34	0.0230266
		0.07552	E3_13	0.04398
		0.07632	E3_31	0.0261441
		0.07664	E3_23	0.0700752
		0.07688	E6_31	0.0526381
		0.0772	E2_42	0.0229028
		0.0772	E6_23	0.0485795
		0.07736	E2_24	0.0606616
		0.078	E3_12	0.0288514
		0.078	B2_13	0.0565764
		0.07808	E3_13	0.0909627
		0.07848	E3_34	0.0317616
		0.0792	E3_33	0.0401127
		0.07928	C6_31	0.0296593
		0.07936	E6_41	0.0655381
		0.07952	E3_43	0.0489627
		0.07968	E6_31	0.06437
		0.0804	E2_22	0.0864508
		0.08112	E3_31	0.0510007
		0.08144	E3_23	0.0204766
		0.0816	E2_21	0.0404969
		0.08168	E3_41	0.0532478
		0.08176	E3_34	0.0261652
		0.08184	D7_14	0.0960037
		0.08216	E3_11	0.0585231
		0.08368	E2_14	0.0247442
		0.084	C6_21	0.0259623
		0.08416	E3_41	0.0287523
		0.0848	E3_34	0.0647619
		0.08512	D7_31	0.0281281
		0.08552	C7_12	0.0818489
		0.08584	B2_22	0.105484
		0.08592	D7_43	0.0331995
		0.086	E2_24	0.257004
		0.08616	E2_34	0.0285591
		0.08632	E3_13	0.114177
		0.08728	E2_14	0.0351793
		0.08824	E2_24	0.0498415
		0.08848	D6_24	0.0266961
		0.08856	E3_13	0.0690319
		0.08936	E3_11	0.0313011
		0.08992	E3_41	0.045636
		0.09224	B2_33	0.0544066
		0.0924	E3_31	0.0383824
		0.09304	D7_44	0.0312397
		0.09312	E3_23	0.0324728
		0.09336	E3_41	0.0691501
		0.09384	D7_22	0.0333668
		0.09392	E3_33	0.0485404
		0.09392	E3_34	0.0473116
		0.09424	D7_12	0.0359238
		0.09464	E7_24	0.0830791
		0.0952	E3_31	0.0291125
		0.096	E2_42	0.0295687
		0.09648	B6_44	0.0363772
		0.09664	E2_21	0.0280747
		0.09664	D7_11	0.0375732
		0.09688	D6_32	0.0441406
		0.09712	E3_34	0.0437954
		0.09736	E2_24	0.273397
		0.09816	E6_23	0.0407938
		0.09824	E3_13	0.0733433
		0.0984	E6_12	0.0355179
		0.09856	E2_32	0.0613371
		0.09904	E3_11	0.0477281
		0.09904	C6_12	0.0412195
		0.09936	E6_31	0.0641287
		0.09936	E3_33	0.033353
		0.0996	E2_24	0.0823971
		0.09976	B2_32	0.0670765
		0.09992	E2_31	0.0230349
		0.10008	E2_34	0.0576996
		0.10064	E2_21	0.0293052
		0.10088	E3_13	0.0649394
		0.10096	E2_42	0.0254553
		0.10112	D7_14	0.0905576
		0.10168	B2_12	0.179743
		0.102	E6_41	0.0581059
		0.10208	E6_31	0.0367594
		0.10288	E3_23	0.0851194
		0.10288	E2_14	0.0243554
		0.1032	E3_34	0.048669
		0.10336	E7_34	0.0539576
		0.10392	B2_12	0.0617715
		0.10416	E3_13	0.0285814
		0.1044	E2_42	0.0267857
		0.10592	E7_24	0.100091
		0.10616	E2_24	0.26849
		0.10672	E3_34	0.0248064
		0.10672	E3_41	0.0593027
		0.1072	E7_34	0.0454761
		0.1076	E6_12	0.0367308
		0.10768	E3_13	0.0588848
		0.108	E3_33	0.048039
		0.10896	E3_43	0.068065
		0.1096	E3_42	0.027117
		0.10976	E3_34	0.0317404
		0.11048	E2_14	0.0301725
		0.11056	E3_13	0.0960725
		0.11072	E2_13	0.0284496
		0.11128	E7_34	0.041851
		0.11184	E3_33	0.0260291
		0.11248	E2_42	0.0250651
		0.11312	E3_12	0.0285218
		0.11408	E2_14	0.0259042
		0.11464	E2_32	0.0297066
		0.1148	C6_31	0.0394105
		0.11528	C7_12	0.070703
		0.11536	E2_22	0.0357922
		0.11536	C6_21	0.0780664
		0.11592	B2_33	0.0587248
		0.11624	E3_31	0.0235509
		0.1164	E3_41	0.0553992
		0.1172	C6_11	0.0401357
		0.11752	B2_32	0.0460442
		0.11824	E3_13	0.0640401
		0.11864	E3_41	0.092674
		0.1188	D7_31	0.0284928
		0.1188	E7_31	0.0288545
		0.11888	C6_41	0.0248116
		0.11912	E2_11	0.0208431
		0.12032	E3_34	0.0612469
		0.1216	E3_32	0.0429156
		0.12176	E3_31	0.0378694
		0.12192	E3_23	0.0723009
		0.12216	E3_41	0.038958
		0.12232	E3_43	0.0487654
		0.12272	E3_33	0.0431501
		0.12336	E3_13	0.0932376
		0.12344	E2_24	0.0661548
		0.12392	E2_14	0.0360934
		0.12416	E6_31	0.0465406
		0.12464	B7_14	0.0266099
		0.12496	B6_32	0.325125
		0.12544	E2_34	0.031273
		0.1256	E3_13	0.0342417
		0.126	E2_24	0.0347144
		0.12656	E3_41	0.0420493
		0.1268	E6_12	0.0296418
		0.12784	E2_14	0.0271478
		0.12824	E2_24	0.182636
		0.12928	E3_23	0.0873541
		0.12936	E2_11	0.0306025
		0.12992	E3_34	0.0294981
		0.13048	E3_41	0.066285
		0.13056	B7_14	0.048747
		0.13064	E2_32	0.0584417
		0.13088	E3_13	0.0610828
		0.13096	B7_22	0.0322837
		0.13104	E2_22	0.0325015
		0.13144	E3_23	0.0312137
		0.13152	E6_23	0.0429878
		0.13176	B2_23	0.187962
		0.13312	E3_13	0.0744635
		0.13368	E3_34	0.0572434
		0.13392	E7_24	0.0845884
		0.13408	E6_41	0.0423751
		0.13552	E3_22	0.0308621
		0.1356	E3_33	0.040506
		0.13624	E3_13	0.117316
		0.13672	E3_23	0.0276382
		0.13688	E2_42	0.0223545
		0.13704	E3_43	0.0799888
		0.1376	B2_12	0.147261
		0.138	E3_33	0.0226631
		0.13824	E3_41	0.0572196
		0.13856	E3_13	0.0433867
		0.13928	E2_22	0.0309183
		0.13952	E2_14	0.0252108
		0.13984	B6_42	0.0563872
		0.14	E3_11	0.0389886
		0.14008	C7_12	0.0641908
		0.14032	E6_31	0.0481417
		0.14056	B2_13	0.0699708
		0.142	E3_34	0.0422719
		0.14216	E2_32	0.0231329
		0.14248	C6_12	0.0533026
		0.14256	B2_14	0.0642547
		0.14264	E3_31	0.0290394
		0.14264	E2_42	0.0282803
		0.14296	E2_24	0.269598
		0.14392	E3_13	0.0709912
		0.14408	B2_33	0.0546202
		0.14416	E2_14	0.0235928
		0.14424	E7_43	0.0452451
		0.14424	E2_22	0.0429123
		0.146	C6_13	0.0438757
		0.14616	E3_13	0.0408675
		0.1476	E6_31	0.0560928
		0.14784	E2_32	0.0479589
		0.14856	E2_22	0.0260462
		0.1488	E3_13	0.0661466
		0.14888	E3_34	0.030916
		0.1492	E2_14	0.0254923
		0.15024	E2_21	0.034978
		0.15096	E3_41	0.0818099
		0.152	E2_34	0.0260096
		0.15232	E2_24	0.034614
		0.1524	E2_42	0.0285544
		0.15264	E3_43	0.0661704
		0.15272	C7_34	0.0497996
		0.1528	E3_33	0.0254681
		0.15328	E3_13	0.0725107
		0.1536	E3_41	0.206865
		0.1536	E2_32	0.0258812
		0.154	E6_41	0.0320539
		0.154	E2_14	0.0259438
		0.15448	E3_11	0.0642243
		0.15488	E3_31	0.0410656
		0.1556	E2_42	0.0271817
		0.15584	E3_41	0.0284
		0.15592	E3_33	0.0291971
		0.15656	E3_34	0.0271363
		0.15664	E3_13	0.0824734
		0.1572	E2_21	0.0281066
		0.15776	C6_21	0.0573758
		0.15832	E3_11	0.0431115
		0.15872	E6_12	0.0362766
		0.15888	E3_13	0.0733757
		0.15888	E2_24	0.25628
		0.16	E2_14	0.0328341
		0.16	C6_42	0.0484412
		0.16016	C6_41	0.0528094
		0.1604	E3_34	0.0421754
		0.16048	E3_33	0.0274018
		0.16128	C6_21	0.026604
		0.16152	E2_31	0.0233183
		0.1616	E2_21	0.023215
		0.16184	E7_34	0.0483531
		0.16184	E6_41	0.0396899
		0.16192	C7_12	0.0690199
		0.16208	E2_32	0.0501158
		0.16216	E2_42	0.0340377
		0.16312	E6_23	0.0435861
		0.1632	E6_31	0.0466836
		0.16352	E2_24	0.0407579
		0.16376	D6_32	0.0499862
		0.16376	E3_13	0.131433
		0.16416	E2_14	0.035808
		0.1644	E3_33	0.0328721
		0.16456	E3_31	0.0392587
		0.16488	E2_22	0.0251082
		0.16536	E7_24	0.0789617
		0.16536	E3_23	0.0230524
		0.16544	E6_31	0.0376907
		0.166	E3_43	0.0688953
		0.16616	E3_34	0.0327761
		0.16632	E3_11	0.0581653
		0.16664	E3_41	0.0515233
		0.16664	B2_12	0.102006
		0.16704	E2_34	0.0529304
		0.16712	E3_13	0.0928901
		0.1676	E2_24	0.216641
		0.16816	E3_42	0.0237543
		0.16904	E2_14	0.0341706
		0.16904	B7_14	0.0282028
		0.16904	E2_21	0.043798
		0.16904	E3_34	0.0416805
		0.16928	B2_33	0.0538818
		0.16936	E3_13	0.0314969
		0.16976	E3_31	0.0247871
		0.16984	B2_12	0.183288
		0.17	E3_41	0.0425185
		0.17024	E3_23	0.0848743
		0.17184	B2_32	0.105567
		0.17232	E3_41	0.0485714
		0.1724	E2_41	0.163419
		0.17272	E2_14	0.0359289
		0.17296	E3_13	0.0675971
		0.17312	B2_13	0.0489644
		0.17312	E2_21	0.0246198
		0.17352	C6_13	0.0374455
		0.17384	E2_42	0.0212706
		0.17528	E6_12	0.0459527
		0.17552	E3_33	0.0350271
		0.17568	E3_31	0.0431585
		0.17616	E2_42	0.0267318
		0.1764	B2_22	0.098396
		0.17672	E2_21	0.0285753
		0.1768	E3_41	0.0302259
		0.17712	E3_11	0.0348623
		0.17728	E3_34	0.0830894
		0.17744	E3_13	0.0835029
		0.1776	E3_23	0.0277847
		0.17768	E3_22	0.0295175
		0.17792	E2_32	0.0289469
		0.17816	E3_33	0.0414215
		0.17992	E3_34	0.0511176
		0.18032	E3_32	0.0355715
		0.1804	E2_14	0.0275664
		0.18048	E6_31	0.0796305
		0.18064	E2_24	0.128055
		0.18128	E2_32	0.0422165
		0.18168	E3_42	0.0223101
		0.18176	E2_22	0.0420132
		0.18192	E3_31	0.033826
		0.18216	E6_23	0.0428578
		0.18224	E3_43	0.109698
		0.18224	E3_13	0.0549162
		0.18256	E7_34	0.051872
		0.1828	E3_41	0.09514
		0.18288	E6_31	0.0411543
		0.18288	E2_24	0.0539614
		0.18456	E2_14	0.0231149
		0.18472	B2_33	0.0552065
		0.18584	E2_42	0.0288372
		0.18584	E3_13	0.104813
		0.18624	E2_34	0.0259981
		0.1872	C6_41	0.0270151
		0.18736	E3_41	0.0485708
		0.18776	E2_24	0.0308554
		0.18888	C7_12	0.0639369
		0.18896	E3_31	0.0641687
		0.18912	E2_11	0.0257947
		0.18944	E2_14	0.0310805
		0.18992	C6_42	0.0469265
		0.19024	E2_21	0.0299393
		0.1904	E3_33	0.0261433
		0.19048	E3_13	0.150512
		0.19056	E3_11	0.041371
		0.19056	E3_32	0.0366589
		0.19104	E3_23	0.0291176
		0.19136	E2_32	0.0540427
		0.19152	C6_12	0.0268926
		0.19256	E7_24	0.0768637
		0.1928	E3_31	0.03175
		0.1932	E2_24	0.281486
		0.19344	E2_42	0.0249783
		0.19368	C6_31	0.0367314
		0.19416	E3_43	0.0470322
		0.19432	E2_14	0.0266844
		0.19472	B2_13	0.0517986
		0.19616	C6_21	0.0608583
		0.19616	B2_12	0.0756223
		0.19672	B2_14	0.0543052
		0.1976	B2_13	0.0623932
		0.19776	E2_41	0.165056
		0.19808	E2_34	0.0220886
		0.19864	E3_23	0.0900579
		0.19888	E3_41	0.0260331
		0.19952	E7_43	0.042263
		0.1996	E2_42	0.0218166
		0.1996	E3_13	0.0780538
		0.1996	B2_12	0.187031
		0.20008	B2_32	0.139924
		0.2004	E2_14	0.0307086
		0.20048	C7_34	0.0424078
		0.20056	E3_11	0.0359522
		0.20104	E3_41	0.0343339
		0.20104	E3_31	0.0284964
		0.20112	B2_33	0.062561
		0.2012	B2_13	0.0569923
		0.20128	E6_31	0.0770864
		0.20184	E3_13	0.0831769
		0.2024	E7_34	0.0510624
		0.2028	E7_43	0.180673
		0.20296	E2_24	0.28179
		0.20304	E3_34	0.044733
		0.20312	E6_41	0.0346677
		0.20312	E3_33	0.0373917
		0.20344	C6_11	0.0306427
		0.2036	E3_41	0.0392738
		0.20368	E6_23	0.0467005
		0.20368	E7_24	0.0810882
		0.20448	B7_34	0.0222023
		0.20488	E3_13	0.0784861
		0.20504	E3_31	0.037789
		0.2056	E2_14	0.0297583
		0.2076	E3_11	0.0317532
		0.20824	E6_12	0.0369725
		0.2084	E2_32	0.0246696
		0.20856	B2_22	0.099405
		0.20888	E2_42	0.0308933
		0.20952	E6_31	0.0714734
		0.20968	C7_12	0.0712914
		0.20968	E2_14	0.0268431
		0.21104	E2_24	0.272607
		0.21152	D7_14	0.0851776
		0.21224	E3_34	0.0480658
		0.21272	E7_43	0.119989
		0.2128	B2_41	0.0274531
		0.21336	E2_42	0.0282392
		0.2136	E3_13	0.0906555
		0.21376	E3_31	0.0266324
		0.21424	E2_14	0.0315022
		0.21488	E3_41	0.0534476
		0.21504	E2_11	0.0258822
		0.21528	E2_24	0.0279959
		0.2156	E3_43	0.0901017
		0.21592	E3_22	0.0221143
		0.216	E3_13	0.108729
		0.21656	E2_32	0.0306761
		0.21672	E3_33	0.0348085
		0.21696	E2_22	0.0283749
		0.21712	E7_43	0.0372146
		0.2172	E3_34	0.0409688
		0.21848	E3_13	0.0352319
		0.21856	E3_11	0.0488229
		0.21856	E3_42	0.0256938
		0.21896	E3_33	0.0329844
		0.21896	E2_14	0.0279803
		0.2196	E3_41	0.0449023
		0.2196	E7_32	0.0215787
		0.22024	E2_32	0.0389135
		0.22032	E7_24	0.0755985
		0.22048	E2_11	0.0532457
		0.22112	E2_24	0.0462469
		0.2216	E7_34	0.0599981
		0.22208	E7_23	0.226416
		0.22264	E2_42	0.0328929
		0.22304	E7_24	0.0351141
		0.22328	E2_21	0.0440978
		0.22336	E6_41	0.0472884
		0.22344	E3_13	0.0721466
		0.22376	E7_13	0.0310564
		0.224	C6_41	0.0261617
		0.22544	E2_14	0.026339
		0.22568	E3_13	0.0506215
		0.22584	E2_24	0.267979
		0.22608	E3_41	0.0304448
		0.22616	E3_23	0.0861557
		0.22624	C6_12	0.0377561
		0.2272	C6_42	0.0586633
		0.22792	E6_31	0.0567833
		0.228	C6_13	0.0411453
		0.22832	D7_23	0.0339121
		0.2284	B2_12	0.163011
		0.22848	B2_13	0.0601729
		0.22888	C7_34	0.0432917
		0.22944	E2_14	0.033989
		0.22944	E3_41	0.066546
		0.23	E2_22	0.0311596
		0.23016	E2_32	0.0547499
		0.23024	E3_13	0.0956992
		0.23064	B2_33	0.0510241
		0.23072	E3_33	0.0366156
		0.2308	B2_32	0.156656
		0.23088	E3_34	0.0388862
		0.23136	C6_41	0.0373083
		0.23176	E3_41	0.0484288
		0.23248	E3_13	0.067365
		0.23264	E3_11	0.0427345
		0.23264	E6_12	0.0307601
		0.23272	E3_23	0.0286704
		0.23296	E3_33	0.0284873
		0.23312	E3_34	0.044219
		0.23336	E2_34	0.0290778
		0.23344	E3_31	0.0349109
		0.2336	B2_32	0.0626162
		0.23376	C6_21	0.0588085
		0.23376	E2_32	0.0393032
		0.23384	E3_43	0.0298913
		0.23416	E6_23	0.0501315
		0.23432	E3_41	0.0325876
		0.23456	E2_14	0.0278364
		0.23552	E6_31	0.0586788
		0.23584	E2_42	0.0481577
		0.23616	E2_24	0.295089
		0.23648	E2_32	0.0393128
		0.23656	B2_13	0.0547609
		0.23696	E2_21	0.0429027
		0.2372	E2_34	0.0312067
		0.23792	E3_13	0.0665403
		0.23816	E2_14	0.0365989
		0.23816	E3_43	0.0969514
		0.23824	E3_31	0.0330434
		0.23824	B2_33	0.0500107
		0.2384	E2_24	0.0279688
		0.23896	D6_32	0.0479757
		0.2392	E2_32	0.0293559
		0.24	E2_42	0.0225596
		0.24016	E3_13	0.0640589
		0.24032	E7_43	0.046182
		0.24056	E2_13	0.060907
		0.24088	E3_11	0.0313761
		0.24096	E3_23	0.0798047
		0.24104	E2_34	0.0397435
		0.24192	E2_24	0.245985
		0.24256	E3_13	0.0835483
		0.24336	E2_14	0.0210637
		0.24376	E7_31	0.0256225
		0.24488	E7_43	0.228967
		0.24512	E3_31	0.0411725
		0.24512	E2_32	0.0314868
		0.24616	E3_41	0.0502052
		0.2464	E2_22	0.0257807
		0.24648	E3_13	0.0667198
		0.24648	E3_34	0.036845
		0.24728	E2_42	0.0250596
		0.2476	E3_11	0.0485166
		0.24792	E2_14	0.0316357
		0.24848	E7_23	0.0434224
		0.24856	E7_43	0.0242595
		0.24872	E3_41	0.0530209
		0.24872	E7_24	0.0764977
		0.24872	E3_13	0.0608802
		0.24888	E3_33	0.0398794
		0.24912	E7_34	0.0562799
		0.24992	E3_23	0.0249444
		0.26008	E3_13	0.0654576
		0.26024	E6_31	0.0329481
		0.2604	E2_34	0.040078
		0.26096	E7_43	0.0899817
		0.26136	E2_24	0.301143
		0.26144	E2_14	0.0236846
		0.26152	B2_12	0.0971918
		0.26208	E3_11	0.0370567
		0.26248	E2_11	0.0205877
		0.26304	E3_33	0.0265851
		0.26344	E3_23	0.1072
		0.26352	E3_31	0.031612
		0.26392	E2_42	0.0263048
		0.26392	E3_41	0.043362
		0.26456	E3_13	0.0694454
		0.26496	C6_12	0.035154
		0.26536	C6_44	0.0496519
		0.26544	E3_34	0.0384339
		0.26552	C6_42	0.0609449
		0.26624	B2_33	0.0541409
		0.26632	E3_23	0.026153
		0.26648	E3_33	0.034535
		0.26656	E2_14	0.0297802
		0.26696	C7_23	0.0548987
		0.26728	B2_32	0.125509
		0.26784	E3_13	0.074976
		0.26792	E3_43	0.0327803
		0.26824	E3_42	0.0290234
		0.26848	E2_24	0.0426137
		0.26864	C6_21	0.0234565
		0.26872	E3_12	0.0401902
		0.26904	E3_31	0.0255211
		0.27	E3_34	0.0520693
		0.27024	E3_43	0.0949804
		0.2704	E2_22	0.0379693
		0.27072	E2_14	0.0323253
		0.2708	E3_13	0.115582
		0.27136	E2_24	0.230105
		0.2724	E7_24	0.0827605
		0.27272	E7_43	0.0403291
		0.27288	E3_31	0.0210388
		0.2732	E3_41	0.0666816
		0.27336	E7_34	0.0506719
		0.27344	E3_13	0.0659825
		0.2736	E2_42	0.0247735
		0.27456	E2_11	0.0361056
		0.27472	E2_22	0.0325298
		0.2748	E2_32	0.032395
		0.27504	E7_23	0.202688
		0.27512	E6_23	0.0486418
		0.27568	E2_21	0.0372997
		0.27584	E2_14	0.0228436
		0.276	E7_14	0.0200769
		0.27616	E6_12	0.0303079
		0.27672	E3_34	0.037058
		0.27672	E2_31	0.0268421
		0.27688	E2_34	0.0334672
		0.27704	E2_32	0.0485182
		0.27712	C6_13	0.03794
		0.27728	E3_23	0.0228896
		0.27832	E2_24	0.0690728
		0.27896	E2_41	0.107898
		0.27928	E2_14	0.0265674
		0.27944	E2_42	0.0364176
		0.27944	E6_41	0.0415354
		0.27968	E6_31	0.0533344
		0.27984	E3_33	0.112376
		0.28024	E3_13	0.0786521
		0.28032	E3_41	0.0716637
		0.2812	E2_24	0.0473374
		0.28232	E3_34	0.0321975
		0.28296	E3_41	0.0417365
		0.28384	D6_32	0.0444753
		0.28432	E2_14	0.0326692
		0.28456	E3_13	0.0675111
		0.28488	E3_34	0.0314903
		0.28496	B2_33	0.0607015
		0.28536	E3_31	0.0361272
		0.2856	E2_11	0.0216612
		0.28592	E2_24	0.249347
		0.28648	E3_32	0.0327763
		0.28664	E3_33	0.0257345
		0.2868	E3_13	0.104189
		0.2868	E3_23	0.0261146
		0.28688	C7_12	0.0633913
		0.28696	E3_41	0.0317615
		0.28744	E2_13	0.0584429
		0.2876	E2_14	0.0238917
		0.28768	E3_43	0.088092
		0.28832	E3_31	0.0267047
		0.28888	E3_33	0.0282547
		0.28944	E2_34	0.0400684
		0.28976	C6_31	0.0287841
		0.29024	E3_23	0.0268461
		0.29048	E3_11	0.0539403
		0.29064	E3_13	0.0538219
		0.29088	B2_32	0.0666708
		0.29112	E2_32	0.0535879
		0.29176	C6_21	0.0538168
		0.29224	E2_14	0.0228043
		0.29224	E2_24	0.0469022
		0.2932	C6_42	0.0588521
		0.29392	E3_13	0.0283657
		0.29416	E3_34	0.0451459
		0.29448	E2_24	0.180801
		0.29456	B2_13	0.0493995
		0.29544	E2_34	0.0221667
		0.2956	B2_23	0.192366
		0.2956	E2_14	0.0263868
		0.29608	E2_21	0.0433086
		0.29632	E3_23	0.0209665
		0.29648	E7_24	0.0441392
		0.29672	E2_24	0.035003
		0.29776	E3_31	0.0409452
		0.29808	E3_13	0.113501
		0.29888	E7_24	0.0310452
		0.29912	E3_33	0.0484377
		0.29912	E3_41	0.028277
		0.29984	E2_34	0.039522
		0.29992	E3_34	0.0481774
		0.30016	E2_24	0.0475372
		0.30024	E3_13	0.0482652
		0.30032	E2_14	0.024327
		0.3016	E3_33	0.0370668
		0.30168	E3_31	0.043676
		0.3024	C6_12	0.0429905
		0.3028	E3_23	0.0920464
		0.3028	E2_42	0.0275872
		0.3032	B2_33	0.0583661
		0.30336	E2_22	0.0308239
		0.30336	E2_32	0.0289668
		0.30392	E2_24	0.228096
		0.304	E2_14	0.0363754
		0.30416	E3_13	0.104344
		0.30432	B7_34	0.0245511
		0.30472	E3_41	0.0416584
		0.3048	E3_12	0.0238979
		0.30504	B2_32	0.0966918
		0.30512	E3_11	0.0367811
		0.30536	E6_31	0.0665751
		0.30608	E6_41	0.0486344
		0.30688	E6_12	0.0377389
		0.30712	E2_13	0.0427965
		0.30712	E6_23	0.0362491
		0.3072	E2_21	0.0317084
		0.30744	E2_42	0.0328516
		0.308	E2_14	0.023192
		0.30808	B7_13	0.0250095
		0.30864	E2_32	0.0429782
		0.30904	E2_11	0.0261427
		0.30928	E3_41	0.0287692
		0.30936	E3_23	0.0334073
		0.30944	E3_33	0.0297124
		0.30952	B7_34	0.0889655
		0.30992	E3_34	0.051716
		0.30992	E3_13	0.0878086
		0.3104	B7_14	0.0232819
		0.31056	E3_31	0.0381413
		0.31168	B7_34	0.0281531
		0.31248	E3_41	0.174495
		0.31264	B7_23	0.0282523
		0.31272	E3_13	0.0754162
		0.3132	E2_24	0.252965
		0.3132	E2_42	0.0281005
		0.31368	B7_24	0.0494295
		0.31448	E7_43	0.031874
		0.31464	B7_14	0.0506328
		0.31464	E6_23	0.0435094
		0.31472	E3_41	0.0476005
		0.31496	E7_23	0.0473448
		0.31592	E3_11	0.0320663
		0.31632	E2_14	0.0259555
		0.31712	B2_12	0.159962
		0.31752	E3_13	0.0668526
		0.31824	E6_12	0.038214
		0.31832	E3_41	0.0439642
		0.31856	E7_23	0.193284
		0.31936	E7_24	0.0857064
		0.31976	E3_13	0.0746433
		0.32	E7_31	0.0373029
		0.32	E2_42	0.0239934
		0.32024	E2_24	0.244853
		0.32056	E2_14	0.0314706
		0.32096	E3_34	0.056956
		0.32152	E3_33	0.0269595
		0.32216	E3_13	0.104413
		0.32248	E2_24	0.0486047
		0.32272	B2_13	0.0512387
		0.3228	E3_23	0.0307245
		0.32304	E2_21	0.0695531
		0.32312	E3_43	0.0326545
		0.32328	E6_41	0.0423933
		0.32336	C7_12	0.0691167
		0.3236	E2_34	0.0407451
		0.32368	E3_34	0.0330349
		0.32376	E3_11	0.0255725
		0.32432	E6_12	0.0453024
		0.32456	E3_13	0.0841522
		0.32488	E2_14	0.0301429
		0.32488	E6_31	0.0437293
		0.32504	E3_23	0.0833979
		0.32544	E2_21	0.0328207
		0.32552	E2_42	0.0215743
		0.326	E3_42	0.0276597
		0.32616	E2_34	0.0408289
		0.32616	E6_41	0.0426052
		0.32648	E3_34	0.0623937
		0.32736	E2_32	0.0263358
		0.32776	E6_31	0.0502408
		0.328	E2_14	0.0273409
		0.32952	E3_13	0.0530944
		0.32984	E3_41	0.0499779
		0.32992	E2_42	0.0326191
		0.33008	E3_31	0.0264413
		0.33016	E2_24	0.209395
		0.3304	D6_32	0.0493548
		0.33048	B2_32	0.121452
		0.33128	E2_14	0.0300873
		0.3324	E2_24	0.0430657
		0.3328	E2_13	0.0454639
		0.33328	E2_32	0.0443216
		0.33336	E2_42	0.0425528
		0.33344	E2_34	0.0248934
		0.33352	E3_41	0.0497318
		0.334	E7_34	0.0477303
		0.334	E2_22	0.0336628
		0.33504	B2_33	0.0695724
		0.33512	E2_14	0.0310242
		0.33656	E3_23	0.020617
		0.33688	D7_23	0.0339776
		0.33704	E3_13	0.0587038
		0.33744	E2_32	0.0289152
		0.338	E3_33	0.0335373
		0.33808	E3_34	0.0293157
		0.33832	E2_42	0.027944
		0.33872	C6_42	0.0509399
		0.33912	E3_31	0.0282619
		0.33912	E3_23	0.0338767
		0.33928	E3_13	0.0901666
		0.33968	E2_34	0.0243489
		0.33984	E3_41	0.0243609
		0.33992	E2_24	0.214926
		0.34024	E3_32	0.0340412
		0.34032	C6_31	0.0280123
		0.34064	E3_34	0.0478068
		0.34168	E3_43	0.103762
		0.34192	E2_14	0.0369793
		0.34224	E3_13	0.0698293
		0.34248	C6_44	0.0491511
		0.34296	E2_21	0.0280021
		0.34296	E3_31	0.0376693
		0.34352	C6_12	0.0374831
		0.34376	E3_11	0.0318784
		0.344	E3_43	0.0247071
		0.34416	E2_42	0.0246947
		0.34432	E3_41	0.0392611
		0.3444	E2_24	0.0544757
		0.34488	E3_23	0.0236929
		0.34552	E6_31	0.050572
		0.34568	E3_32	0.0395053
		0.34736	E2_14	0.0326643
		0.34744	E2_22	0.0294006
		0.34752	E3_41	0.0423003
		0.34784	C6_13	0.0392916
		0.34864	E3_34	0.0500212
		0.34872	E3_13	0.0856168
		0.34872	E6_31	0.0675973
		0.3492	E2_24	0.0361911
		0.34984	E2_22	0.0305837
		0.35	E2_21	0.0410793
		0.35088	D6_32	0.0459016
		0.35096	E3_13	0.0973215
		0.3512	E2_42	0.0421748
		0.35128	E3_34	0.0324027
		0.35136	E2_24	0.254227
		0.35144	E6_41	0.0625113
		0.35152	E6_12	0.0500151
		0.35168	E3_33	0.0382783
		0.35176	E3_31	0.024134
		0.35192	E2_32	0.0558637
		0.35264	E3_41	0.0317824
		0.3528	E2_14	0.033885
		0.35392	E3_33	0.0283447
		0.35424	E2_24	0.055609
		0.3548	E3_13	0.0636377
		0.35488	E3_23	0.0721948
		0.35488	E2_13	0.0247005
		0.35632	E2_14	0.0318516
		0.35656	E3_41	0.223007
		0.35712	E3_23	0.0298836
		0.35768	B2_13	0.0518745
		0.35776	E6_23	0.0425838
		0.35832	E3_13	0.0764793
		0.3588	E3_41	0.0327539
		0.35888	E6_12	0.0274765
		0.35888	E2_42	0.0239931
		0.36016	E2_14	0.0303695
		0.3604	E2_24	0.0334445
		0.36088	E3_13	0.0603069
		0.36272	E3_41	0.0344065
		0.36312	E3_13	0.0440532
		0.3652	E7_43	0.0442544
		0.36552	E2_14	0.0275792
		0.36568	E2_32	0.0408734
		0.36576	E2_24	0.229749
		0.36608	C6_41	0.0239761
		0.36632	C6_31	0.0404998
		0.36664	E7_24	0.078994
		0.36768	B2_12	0.196762
		0.368	E2_24	0.0306086
		0.36848	E2_32	0.031362
		0.36856	E2_42	0.0249179
		0.36856	E3_13	0.0583896
		0.36864	E3_41	0.0466365
		0.3692	E2_14	0.0213053
		0.36928	E2_34	0.0299036
		0.36992	E2_13	0.0303375
		0.37008	E2_21	0.0348743
		0.37016	E3_23	0.0255674
		0.37032	E7_34	0.0596601
		0.37096	E3_13	0.0994628
		0.3716	B2_33	0.0461996
		0.37168	E3_34	0.0467368
		0.37176	E3_33	0.123319
		0.37248	E2_24	0.0510568
		0.37272	E2_34	0.0469938
		0.37288	E3_41	0.0492067
		0.37304	E7_24	0.0339325
		0.3732	E3_13	0.072
		0.37328	E3_31	0.0391327
		0.37392	E2_14	0.026747
		0.37408	E2_22	0.0288164
		0.37448	E3_33	0.0223141
		0.3748	E2_42	0.024153
		0.37488	E6_23	0.0511556
		0.3756	E3_13	0.085851
		0.37624	E3_23	0.0228537
		0.37632	E3_43	0.0322472
		0.37656	C6_42	0.0543898
		0.3768	C7_12	0.0716828
		0.3772	E6_41	0.0476214
		0.37744	E6_31	0.049347
		0.37752	E2_14	0.0280662
		0.37912	E3_31	0.0294805
		0.37936	E6_12	0.0453422
		0.37984	E2_11	0.0211733
		0.37992	E3_13	0.0747967
		0.37992	B7_14	0.0508451
		0.38016	E3_41	0.047312
		0.3804	C6_12	0.0459394
		0.38064	E2_24	0.270348
		0.38104	C7_23	0.0703857
		0.38136	E3_23	0.107235
		0.38272	E3_13	0.0936965
		0.38288	E2_24	0.0516954
		0.38352	B7_34	0.0836131
		0.38432	E2_32	0.0272795
		0.38448	E2_13	0.0244056
		0.38488	E2_42	0.0295605
		0.38512	D6_32	0.0401106
		0.3852	B2_13	0.0519715
		0.3852	E2_14	0.032696
		0.3852	E2_22	0.043148
		0.38528	E3_23	0.0246236
		0.38592	E3_13	0.0656554
		0.38608	E3_31	0.0241738
		0.38616	E3_11	0.0429643
		0.38624	E2_31	0.0219199
		0.38672	E3_41	0.167134
		0.38744	E2_21	0.039266
		0.3876	E2_24	0.058781
		0.38848	C6_13	0.0468423
		0.38856	B7_34	0.0476527
		0.38856	E3_33	0.0364516
		0.3888	C6_21	0.063482
		0.38896	E3_41	0.0658196
		0.38936	E2_14	0.0236283
		0.38952	E2_42	0.0481306
		0.39032	E3_23	0.0265211
		0.39032	E2_13	0.0397086
		0.39104	E3_32	0.0309305
		0.39192	E2_24	0.228664
		0.392	E3_31	0.0492017
		0.392	B6_44	0.0210537
		0.392	B2_32	0.108081
		0.39216	E3_13	0.0539814
		0.39256	E3_41	0.0362479
		0.39288	B2_33	0.0595659
		0.39352	E2_14	0.0339058
		0.3944	E3_13	0.0700085
		0.39496	E2_42	0.0301833
		0.39528	E2_22	0.0266687
		0.39552	E3_23	0.0242135
		0.3964	C7_12	0.0666979
		0.39664	E3_13	0.0860418
		0.39712	E2_14	0.0319471
		0.39712	E3_33	0.035518
		0.39752	E2_24	0.0529868
		0.39768	E7_24	0.0853579
		0.39768	B7_32	0.128692
		0.39792	E2_34	0.0354836
		0.39888	E2_22	0.0399741
		0.39896	E3_41	0.0379278
		0.39928	E7_34	0.0425672
		0.39952	E2_32	0.0353778
		0.39952	E2_21	0.0679565
		0.39984	E3_13	0.0570764
		0.40056	E3_33	0.0340869
		0.4012	E2_42	0.0298487
		0.4012	E6_31	0.0953473
		0.40136	E2_24	0.256893
		0.40224	E2_21	0.040976
		0.40264	E2_34	0.0232641
		0.40272	E3_23	0.0327897
		0.40328	E3_13	0.0672493
		0.40336	E6_12	0.0340808
		0.40336	E3_31	0.0298358
		0.40352	E3_34	0.0369224
		0.40376	E6_41	0.0463005
		0.40416	E3_41	0.0632338
		0.40432	E7_34	0.0468611
		0.40496	E3_43	0.0325041
		0.40592	E3_13	0.0534774
		0.40632	E3_33	0.034076
		0.40632	E3_31	0.0458553
		0.40712	E2_14	0.0296205
		0.40728	E3_21	0.0285148
		0.408	E2_24	0.0597916
		0.40832	E6_23	0.0431433
		0.4084	E3_13	0.0996853
		0.40888	B2_14	0.0407312
		0.40944	E7_43	0.143569
		0.41	E3_33	0.0429844
		0.41016	E2_42	0.0300741
		0.41024	E3_43	0.127703
		0.41072	E3_23	0.106317
		0.41088	E3_13	0.0634572
		0.41104	E2_14	0.0424746
		0.41104	E2_13	0.0477371
		0.41168	E3_41	0.170742
		0.41168	E2_24	0.242106
		0.41256	E6_12	0.0373038
		0.41256	E2_32	0.0274943
		0.41288	E7_23	0.0444829
		0.41328	D6_13	0.0321192
		0.41368	E3_13	0.0299237
		0.41416	E3_41	0.0658461
		0.41424	E2_24	0.0264367
		0.4148	E2_32	0.0363119
		0.41528	E2_14	0.0362109
		0.41576	E3_34	0.0340621
		0.41608	B7_14	0.0479023
		0.41656	E2_22	0.0269763
		0.41744	E2_21	0.0265268
		0.41752	E2_42	0.0394343
		0.418	E7_24	0.0837149
		0.418	E2_34	0.0334518
		0.418	E2_31	0.0409683
		0.41808	E2_11	0.0280774
		0.41808	E3_11	0.0321103
		0.41808	E2_32	0.0329046
		0.41808	E3_31	0.0349914
		0.41824	E3_41	0.0287321
		0.4192	E7_34	0.044448
		0.41936	E3_13	0.0685228
		0.4196	E2_24	0.217328
		0.41984	C6_42	0.0558659
		0.42	E3_33	0.0341525
		0.42104	E2_14	0.0351761
		0.42176	E2_24	0.0223196
		0.42192	B2_33	0.0570294
		0.42208	C6_31	0.042014
		0.42208	D6_32	0.0459779
		0.42216	E2_13	0.0320469
		0.42216	E3_41	0.0451129
		0.42216	E2_21	0.0308078
		0.42248	E3_31	0.0275908
		0.42256	E3_23	0.0264394
		0.4228	B2_13	0.0558051
		0.42296	E3_34	0.0523253
		0.42336	E2_42	0.0254287
		0.42344	B7_34	0.0727244
		0.42352	C6_12	0.0390118
		0.42376	E7_23	0.0385608
		0.42416	E7_43	0.0452958
		0.42432	E3_13	0.0657813
		0.4248	E2_14	0.0235867
		0.42504	E3_41	0.0301796
		0.4252	E7_41	0.0293984
		0.42528	C6_21	0.0567387
		0.42624	E6_31	0.0602982
		0.4264	E7_43	0.114582
		0.42656	C6_42	0.0333576
		0.42664	E3_23	0.0239801
		0.42672	E3_11	0.0279215
		0.4268	B7_34	0.0335459
		0.4268	E3_34	0.0313725
		0.4272	E3_13	0.0553621
		0.42752	E7_31	0.0396344
		0.42768	E3_21	0.0264584
		0.42776	E3_42	0.0294823
		0.42808	E3_41	0.0407965
		0.42864	C6_44	0.0480153
		0.42904	E2_13	0.0279912
		0.42904	E3_34	0.047289
		0.42912	E2_34	0.035824
		0.42944	E2_24	0.0590866
		0.42944	E3_13	0.0694261
		0.4296	E2_42	0.0247497
		0.42976	E3_32	0.0854306
		0.42992	E7_23	0.210802
		0.43016	E2_14	0.0340207
		0.43032	E3_33	0.0266082
		0.43104	C6_13	0.0467201
		0.43128	E6_41	0.0719697
		0.43152	E6_31	0.0712714
		0.43184	E2_24	0.245093
		0.43192	E2_22	0.033915
		0.43192	E2_42	0.0271521
		0.43224	E3_13	0.05007
		0.43272	E2_34	0.04484
		0.4336	E7_21	0.0447761
		0.43368	D7_23	0.0304929
		0.43432	E3_23	0.0878089
		0.43496	E2_24	0.0320804
		0.43528	E3_41	0.0409657
		0.43536	E2_14	0.0395478
		0.43592	E2_32	0.0272419
		0.436	E2_22	0.0394881
		0.4364	E3_13	0.0731644
		0.4376	E3_11	0.0412903
		0.43864	E2_34	0.0279958
		0.4388	E3_13	0.103108
		0.43912	E3_33	0.115795
		0.43928	E2_24	0.0750848
		0.4396	E2_42	0.0358229
		0.4396	E2_14	0.0326121
		0.43992	E2_21	0.0361131
		0.44096	E3_34	0.0768334
		0.44112	E3_31	0.031516
		0.44112	E3_41	0.0342076
		0.44208	E3_33	0.0246133
		0.44232	B2_32	0.122122
		0.44312	E3_13	0.0512216
		0.44376	E3_41	0.0539849
		0.44384	E3_34	0.0398708
		0.444	E2_31	0.0270836
		0.44408	E3_23	0.0330176
		0.44408	E2_14	0.0285387
		0.44416	E2_32	0.0303498
		0.44416	B7_24	0.155378
		0.44424	E2_34	0.0218496
		0.44432	E2_24	0.223303
		0.44448	D6_32	0.0503598
		0.44616	E7_24	0.0845295
		0.4464	B7_14	0.0469598
		0.44672	E2_32	0.0267379
		0.4468	E7_34	0.0637414
		0.44688	E3_13	0.0329183
		0.44712	E6_23	0.0439336
		0.4472	E3_41	0.047211
		0.44728	E3_34	0.0277929
		0.44752	E2_42	0.0243626
		0.44752	E3_31	0.0414334
		0.44768	E7_43	0.0481819
		0.448	E7_23	0.190855
		0.44848	C7_23	0.0619472
		0.44944	E6_12	0.0305285
		0.4496	E3_13	0.093622
		0.44976	D6_24	0.0291721
		0.45	E2_14	0.0334115
		0.4504	E6_41	0.0476191
		0.45088	B7_14	0.0526749
		0.45128	E2_24	0.0612355
		0.45176	E2_31	0.0287332
		0.45264	E7_41	0.130582
		0.45288	E2_34	0.040679
		0.4536	E6_31	0.0666076
		0.45368	E2_32	0.037671
		0.45376	E2_42	0.0314455
		0.45496	E7_43	0.0765385
		0.4552	E2_21	0.0290439
		0.45544	E2_14	0.0333876
		0.45576	E2_22	0.024545
		0.456	E2_24	0.2276
		0.45664	E3_22	0.0245215
		0.45664	E7_34	0.0583279
		0.4568	E3_41	0.0385387
		0.45704	E3_13	0.0867457
		0.45736	E6_12	0.0344508
		0.45872	E6_31	0.0408803
		0.45888	E3_43	0.033838
		0.45904	E3_41	0.0431543
		0.45904	E3_34	0.0510746
		0.45928	E6_41	0.03983
		0.45952	E3_13	0.0797215
		0.4596	E3_23	0.0418963
		0.45976	B7_13	0.246311
		0.45992	E2_32	0.0264944
		0.46016	E3_33	0.0398791
		0.46016	E2_14	0.0296394
		0.46072	E2_42	0.0317228
		0.4608	E3_31	0.0238695
		0.462	E3_13	0.0348357
		0.462	E3_41	0.0413032
		0.46224	E2_24	0.040769
		0.46288	E3_33	0.0249879
		0.46344	C7_11	0.0622376
		0.46368	E3_31	0.0417965
		0.464	E2_42	0.0242365
		0.46504	E3_11	0.0353582
		0.46504	E3_13	0.074441
		0.46544	B7_13	0.0227902
		0.46544	E2_34	0.044558
		0.46552	B2_33	0.0585051
		0.46584	B2_12	0.178372
		0.46648	E2_24	0.236397
		0.46656	E3_31	0.0251917
		0.46728	B7_24	0.0660897
		0.46736	C6_42	0.0546352
		0.46736	E2_32	0.0259752
		0.46792	D7_11	0.0367769
		0.46792	E3_13	0.0939354
		0.468	E2_14	0.0378908
		0.46944	E3_33	0.0980197
		0.46984	E2_11	0.0258874
		0.47008	E3_13	0.0757913
		0.47032	E3_34	0.0280782
		0.4704	C6_41	0.0318779
		0.4708	E2_21	0.0261658
		0.47096	C6_12	0.0438151
		0.47128	E2_24	0.211502
		0.47144	E2_13	0.0492693
		0.47176	E3_33	0.0295064
		0.47248	E2_14	0.0284923
		0.47352	E3_34	0.0352604
		0.47352	E2_24	0.0447195
		0.4736	C7_12	0.0754014
		0.47376	E6_23	0.0470984
		0.47384	E3_13	0.0701988
		0.47432	E2_31	0.0303625
		0.47456	E2_42	0.0241884
		0.47496	C6_31	0.0328325
		0.47576	E2_32	0.0598329
		0.47584	E3_12	0.0381678
		0.47584	E7_24	0.0426768
		0.476	C6_21	0.075921
		0.47616	E3_13	0.0241603
		0.47648	E2_21	0.0553189
		0.47648	E3_41	0.167176
		0.47712	E6_31	0.0531262
		0.4776	E3_34	0.0557335
		0.47872	E3_13	0.0752816
		0.47888	E3_41	0.0420004
		0.47968	E2_14	0.030125
		0.47976	E2_24	0.0503013
		0.47984	E3_34	0.0276738
		0.47992	E3_31	0.0383719
		0.48024	E6_31	0.0547555
		0.4804	E6_41	0.0525018
		0.48072	E3_43	0.104878
		0.48104	E3_13	0.033529
		0.4824	B6_44	0.0207616
		0.48312	E2_24	0.291674
		0.48336	E3_13	0.106527
		0.48376	B7_32	0.123075
		0.484	E2_42	0.0385995
		0.48496	E3_41	0.0390362
		0.48512	E2_34	0.0223532
		0.48528	E3_33	0.0372874
		0.48544	E3_23	0.100621
		0.4856	E3_13	0.0336142
		0.486	E2_14	0.0346238
		0.4868	B2_13	0.0652055
		0.48744	E2_24	0.0495112
		0.48824	C7_11	0.0474296
		0.48848	E2_32	0.0436194
		0.48848	C7_23	0.063746
		0.48936	B2_12	0.171793
		0.49016	E3_13	0.0722891
		0.49032	E3_34	0.0301422
		0.49048	E2_42	0.0245
		0.49088	E3_41	0.043891
		0.49112	E2_34	0.0488457
		0.49128	E2_14	0.0305611
		0.49176	E2_24	0.20815
		0.49192	E3_31	0.0195429
		0.492	E2_13	0.0261906
		0.4936	E6_23	0.0378711
		0.49392	B2_33	0.0619108
		0.49392	D6_24	0.0240895
		0.49408	E2_21	0.0582674
		0.49496	E3_34	0.037884
		0.49536	E3_31	0.0218691
		0.49552	E3_13	0.09076
		0.49568	E6_31	0.0839198
		0.49584	E3_33	0.0417015
		0.49592	E2_14	0.0267908
		0.496	E3_41	0.038282
		0.49624	E2_42	0.03291
		0.49632	E3_11	0.0395562
		0.49656	E6_12	0.0281965
		0.4968	E2_21	0.0270662
		0.49736	E3_34	0.0283671
		0.49808	D6_13	0.0284715
		0.4988	E3_13	0.0577983
		0.49904	E3_31	0.0392624
		0.4992	E3_42	0.0257422
		0.4992	E2_32	0.0323812
		0.49936	E3_41	0.0471489
		0.49976	E2_14	0.0310581
		0.51	B3_11	0.216108
		0.51	C3_32	0.249352
		0.51	C3_34	0.0433785
		0.51	C3_14	0.42881
		0.51	C3_13	0.0581349
		0.51	C3_11	0.141808
		0.51	D3_13	0.354455
		0.51	D3_23	0.0574001
		0.51	D3_32	0.0771451
		0.51	B2_32	0.0916625
		0.51	D3_24	0.0525922
		0.51	D3_33	0.0414939
		0.51	B2_13	0.12501
		0.51	C2_44	0.0614178
		0.51	E2_21	0.102863
		0.51	C2_33	0.0687268
		0.51	C2_14	0.0597056
		0.51	D3_14	0.167053
		0.51	C2_22	0.209765
		0.51	B3_31	0.0383364
		0.51	D3_43	0.0535578
		0.51	D2_13	0.127136
		0.51	D2_31	0.0448208
		0.51	D2_11	0.458584
		0.51	D2_21	0.0964049
		0.51	D2_44	0.0516942
		0.51	D2_34	0.0671045
		0.51	D2_14	0.208153
		0.51	D3_22	0.0674493
		0.51	D2_41	0.0719264
		0.51	D2_33	0.0562313
		0.51	E3_41	0.0529485
		0.51	B3_32	0.047013
		0.51	E3_11	0.0717933
		0.51	D3_41	0.152061
		0.51	B3_33	0.277408
		0.51	B3_14	0.434834
		0.51	B7_34	0.0611421
		0.51	C2_12	0.102807
		0.51	D2_12	0.219728
		0.51008	E2_22	0.0360404
		0.51008	D3_31	0.0650821
		0.51008	D3_21	0.25669
		0.51008	D2_42	0.160799
		0.51008	B3_43	0.0738233
		0.51008	E3_34	0.0540905
		0.51008	B2_11	0.0403401
		0.51008	B2_12	0.0536498
		0.51016	C2_43	0.0567392
		0.51016	C6_41	0.0394498
		0.51016	C3_41	0.126025
		0.51016	B2_41	0.041652
		0.51016	D3_44	0.0876015
		0.51024	C2_24	0.0409599
		0.51024	C3_33	0.0428347
		0.51024	C2_11	0.0875173
		0.51024	E2_24	0.259493
		0.51024	C3_24	0.194781
		0.51032	E2_31	0.0323179
		0.51032	C2_13	0.0346516
		0.51032	E2_43	0.0870318
		0.51032	B3_34	0.0338545
		0.51032	B3_13	0.0678656
		0.5104	C3_21	0.0375099
		0.5104	C3_42	0.0349189
		0.5104	C2_31	0.0609895
		0.5104	E2_34	0.0546313
		0.5104	B3_23	0.0582892
		0.51048	E3_22	0.0253428
		0.51048	B3_12	0.0262897
		0.51048	E3_23	0.0300278
		0.51064	E7_34	0.0479204
		0.51064	C3_12	0.0409974
		0.51072	B3_42	0.0554342
		0.51072	E3_33	0.0394269
		0.51104	E2_13	0.0335887
		0.51104	B3_24	0.0494161
		0.5112	E2_32	0.0384998
		0.5112	B3_22	0.0353399
		0.51128	E2_44	0.0661076
		0.51136	D3_42	0.0230958
		0.51224	D2_13	0.111421
		0.51224	C3_32	0.042028
		0.51224	C2_12	0.0841397
		0.51224	D2_12	0.0357619
		0.51224	D2_21	0.0527106
		0.51232	D3_21	0.0471691
		0.51232	D3_23	0.0310322
		0.51232	B3_43	0.0956215
		0.51232	D3_41	0.033153
		0.51232	B3_11	0.0469234
		0.5124	C3_41	0.0629495
		0.51248	C2_11	0.0400833
		0.51248	C2_14	0.03612
		0.51248	E2_24	0.0568939
		0.51248	E3_34	0.0329707
		0.51248	B3_31	0.0321705
		0.51248	D2_14	0.0356495
		0.51256	D2_11	0.0591055
		0.51264	B3_21	0.0288708
		0.51264	C3_42	0.0534845
		0.51264	E3_41	0.0384239
		0.51264	B3_14	0.0573546
		0.51264	C3_21	0.0822327
		0.51264	B3_33	0.061707
		0.51272	C2_31	0.0274057
		0.51272	C3_24	0.0821613
		0.51272	D2_33	0.0941736
		0.5128	C2_22	0.0362877
		0.51296	E3_33	0.0457871
		0.51304	B2_44	0.0352031
		0.51304	D3_32	0.0319695
		0.51304	E2_22	0.0248127
		0.51312	B3_32	0.0401334
		0.5132	D3_22	0.0245491
		0.5132	D3_13	0.0837128
		0.51344	C2_43	0.116826
		0.51352	C3_14	0.0383773
		0.51352	B3_22	0.031327
		0.51368	B3_23	0.0932545
		0.51376	B3_24	0.0502128
		0.51376	D3_43	0.0258536
		0.51392	B3_42	0.0317436
		0.514	D3_14	0.0362512
		0.51408	E6_12	0.0339494
		0.51408	E3_13	0.0460409
		0.51416	D7_33	0.0888517
		0.51424	D3_31	0.101577
		0.51424	C3_11	0.0493148
		0.5144	E3_42	0.0348058
		0.51456	D3_21	0.167131
		0.51456	C2_44	0.0519768
		0.51456	B3_11	0.0717872
		0.51472	C3_32	0.027347
		0.51472	E2_24	0.0563951
		0.51472	D2_13	0.0325584
		0.5148	D3_41	0.0646942
		0.51488	B3_14	0.131022
		0.51496	B3_33	0.0442393
		0.51496	D2_31	0.0305102
		0.51496	D2_11	0.216147
		0.51504	B7_24	0.0626334
		0.51504	C2_14	0.0317881
		0.51504	C3_24	0.0686784
		0.51528	E3_41	0.038394
		0.51528	C2_11	0.0467987
		0.51528	E2_32	0.0385042
		0.51544	D3_13	0.0204306
		0.51544	D2_34	0.0387408
		0.5156	D2_14	0.03797
		0.5156	B3_31	0.0600231
		0.5156	E3_11	0.0623989
		0.51568	C2_43	0.0312085
		0.51576	C7_44	0.033465
		0.51576	C3_21	0.0449709
		0.51584	D2_12	0.124794
		0.51584	D2_21	0.0291176
		0.51584	D3_32	0.0369285
		0.51584	C3_14	0.0974299
		0.51616	D3_33	0.0412788
		0.51616	B3_12	0.0333197
		0.51632	E3_13	0.0435722
		0.5164	C7_12	0.0700662
		0.5164	B2_33	0.0500705
		0.51648	E6_23	0.0478837
		0.51656	B2_44	0.0433962
		0.51672	D2_44	0.0681957
		0.5168	C2_44	0.0323426
		0.51688	B3_11	0.153237
		0.51696	C3_31	0.0299384
		0.51712	D2_13	0.0438227
		0.5172	D2_11	0.0969598
		0.51728	B3_33	0.0580262
		0.51736	D2_31	0.0364092
		0.51744	D3_31	0.0346307
		0.51768	E3_31	0.0302445
		0.51768	D3_22	0.0690796
		0.51784	D3_43	0.0628984
		0.51792	C2_12	0.0532213
		0.51792	B3_43	0.03939
		0.51808	B3_14	0.0831267
		0.51808	E3_33	0.0244708
		0.51824	D3_32	0.0318058
		0.51824	C2_11	0.0319962
		0.51848	D3_41	0.0315168
		0.51888	C3_14	0.0561367
		0.51896	B3_23	0.106219
		0.51904	E2_24	0.0451972
		0.5192	D3_21	0.162286
		0.51928	D2_42	0.0471236
		0.51936	C2_22	0.0752919
		0.51936	B3_32	0.0437566
		0.51952	D3_13	0.0605876
		0.51952	B3_11	0.0424973
		0.51976	D2_21	0.0346734
		0.51976	D2_33	0.0401606
		0.51984	E3_34	0.0282846
		0.51992	B3_33	0.0315961
		0.51992	E3_41	0.0628204
		0.52	C2_14	0.0480175
		0.52016	D2_13	0.0311933
		0.52024	D2_14	0.0343893
		0.52032	C2_43	0.0306105
		0.52032	D6_33	0.0257717
		0.52048	C3_21	0.0451727
		0.52048	D2_12	0.0944123
		0.52064	D3_31	0.104525
		0.52064	D3_41	0.076527
		0.5208	C3_24	0.0735235
		0.52096	C2_12	0.0273588
		0.52112	D2_11	0.0431129
		0.5212	D3_33	0.0550901
		0.52136	C3_11	0.0418411
		0.52144	C3_14	0.105764
		0.52152	D2_44	0.0751551
		0.52168	B7_14	0.0431188
		0.52176	B3_24	0.0606315
		0.52184	B2_33	0.0499642
		0.522	E3_13	0.050756
		0.52224	C3_32	0.0292012
		0.52224	C2_14	0.040393
		0.52232	E6_31	0.0655477
		0.52232	C3_41	0.0698484
		0.5224	B3_11	0.0902194
		0.52248	B3_14	0.0773753
		0.52256	B3_33	0.0551407
		0.52264	B3_43	0.0340791
		0.52272	D2_13	0.0484939
		0.52272	C2_33	0.0358355
		0.52288	D3_41	0.0385759
		0.52304	D2_31	0.0276467
		0.52304	C3_24	0.0506416
		0.52312	B3_23	0.119475
		0.5232	D2_12	0.141016
		0.52328	D2_42	0.107575
		0.52336	E3_33	0.0408076
		0.52336	D2_11	0.126439
		0.52352	C3_21	0.0495117
		0.52352	C3_34	0.0308478
		0.5236	D2_14	0.0453083
		0.5236	D2_21	0.0604747
		0.52368	C3_14	0.0550935
		0.52376	E6_41	0.0299656
		0.524	E2_14	0.0315466
		0.524	B3_24	0.0348647
		0.52408	D2_33	0.0344736
		0.52416	D2_34	0.0405074
		0.52424	E2_32	0.0497947
		0.52424	D3_22	0.0538031
		0.52432	D3_32	0.0399966
		0.52432	D3_31	0.093597
		0.5244	D3_13	0.0760073
		0.52448	C2_14	0.0435198
		0.52448	B3_13	0.0507188
		0.52448	C3_32	0.0507295
		0.52448	C2_31	0.0562155
		0.52456	E6_31	0.0638563
		0.52464	C3_41	0.0575978
		0.52464	B3_11	0.237297
		0.52472	C2_41	0.0448588
		0.52472	E2_24	0.0631775
		0.5248	B3_33	0.0506423
		0.5248	D2_41	0.0942447
		0.52488	B3_31	0.0363052
		0.52496	B3_14	0.124528
		0.52496	D2_13	0.132917
		0.52504	C2_11	0.0704955
		0.52528	C2_33	0.0480409
		0.52528	D3_21	0.186512
		0.52528	B7_13	0.0259472
		0.52536	D3_14	0.025823
		0.52536	D3_33	0.0549749
		0.52544	E3_34	0.0409289
		0.52552	D2_12	0.0426382
		0.52552	C3_24	0.0427802
		0.52552	D2_42	0.0383661
		0.5256	D2_11	0.270542
		0.5256	B2_12	0.0953259
		0.5256	C2_22	0.0337849
		0.52576	B3_32	0.0523073
		0.52576	C3_21	0.0415372
		0.52584	D2_14	0.10332
		0.52584	D2_44	0.0663796
		0.52584	D2_21	0.0452065
		0.52592	C3_14	0.0808167
		0.526	C3_33	0.0489681
		0.52624	E3_41	0.0385395
		0.5264	D3_41	0.137619
		0.52648	C2_12	0.106974
		0.52648	D3_22	0.122931
		0.52648	D3_43	0.0639283
		0.52672	D3_23	0.0359763
		0.5268	B3_22	0.0727823
		0.5268	D3_13	0.0293258
		0.52704	C2_13	0.0302055
		0.52704	B3_24	0.0406982
		0.52704	C3_11	0.0399571
		0.52712	B2_41	0.0296367
		0.5272	B2_33	0.0407516
		0.52728	C3_41	0.0462156
		0.52728	B3_43	0.0435532
		0.52736	D3_31	0.0318846
		0.52736	B3_33	0.0460463
		0.52736	B7_32	0.121741
		0.52744	B3_42	0.0450015
		0.52752	B3_23	0.142355
		0.5276	D2_31	0.0293762
		0.52768	E2_14	0.0340812
		0.52768	E3_13	0.0377451
		0.52776	D2_12	0.142124
		0.52776	B3_11	0.028624
		0.52784	C2_43	0.148861
		0.52784	C2_22	0.0632532
		0.52784	D2_13	0.0582293
		0.52784	C2_33	0.0286088
		0.52784	D3_32	0.0417358
		0.52792	D3_14	0.0397273
		0.52792	C2_14	0.0492222
		0.528	B3_21	0.0295904
		0.528	B3_14	0.0627628
		0.528	D3_21	0.0372625
		0.52808	D2_14	0.0403759
		0.52824	D2_11	0.194949
		0.52848	C3_14	0.208581
		0.52864	C3_24	0.0503317
		0.52872	C2_12	0.061609
		0.52872	E6_41	0.032045
		0.5288	C2_44	0.0602883
		0.52888	E2_21	0.0351283
		0.52888	C2_11	0.0772269
		0.52912	B3_12	0.0262778
		0.52952	C3_41	0.165289
		0.52952	D3_13	0.0610104
		0.52952	D3_23	0.0261579
		0.52952	D3_44	0.0333225
		0.5296	D3_31	0.0817436
		0.52976	D3_43	0.0564259
		0.52976	E2_13	0.0377386
		0.52976	D2_41	0.0605069
		0.52984	D3_24	0.0313928
		0.52992	E3_13	0.0477291
		0.52992	B7_34	0.0745999
		0.53	C3_34	0.0298631
		0.53	B3_11	0.0784093
		0.53008	C3_32	0.0906053
		0.53008	D3_14	0.0852816
		0.53016	D2_42	0.081451
		0.53016	D2_34	0.0499639
		0.53016	D2_12	0.0376901
		0.53016	D3_33	0.0502319
		0.53024	C3_42	0.0775487
		0.53024	C2_14	0.0649301
		0.53024	C3_21	0.0537239
		0.53024	D3_41	0.105052
		0.53032	D6_13	0.0656743
		0.53032	C2_43	0.0427121
		0.5304	D2_11	0.0554813
		0.53064	B3_14	0.195311
		0.53064	C6_13	0.055427
		0.53064	B3_32	0.0379317
		0.53072	C3_14	0.101205
		0.5308	D3_21	0.0354534
		0.53104	B3_31	0.0328536
		0.53104	D3_32	0.0406555
		0.53112	C2_12	0.0306762
		0.5312	B3_33	0.0706918
		0.53128	D2_14	0.0341555
		0.53128	B2_22	0.0973145
		0.53128	D2_13	0.0801797
		0.53128	B3_23	0.105247
		0.53144	C2_22	0.0414622
		0.53152	B3_43	0.0445115
		0.53168	B3_24	0.0483448
		0.53176	C2_31	0.0473196
		0.53176	C3_13	0.0408616
		0.53192	C3_41	0.0878965
		0.53192	D2_21	0.0632096
		0.53208	B3_42	0.0427562
		0.53208	E3_13	0.0344515
		0.53208	D2_44	0.056361
		0.53208	C3_11	0.0382849
		0.53224	B2_44	0.0303825
		0.53232	C3_32	0.0533836
		0.5324	C3_24	0.0558989
		0.5324	D2_42	0.0639137
		0.5324	C2_13	0.0319355
		0.53248	D2_33	0.222611
		0.53248	D3_41	0.0262882
		0.53248	D2_12	0.120961
		0.53256	D2_34	0.0422688
		0.53264	B7_34	0.06404
		0.53288	E3_41	0.0480454
		0.53288	B3_14	0.110709
		0.53288	D2_11	0.486169
		0.53288	E2_24	0.0321477
		0.53288	B7_24	0.157791
		0.53296	C3_14	0.107916
		0.53296	D2_31	0.0336862
		0.53312	E6_23	0.0449802
		0.5332	C3_12	0.0420221
		0.53328	B3_13	0.0372175
		0.53344	B3_32	0.0414131
		0.53344	B3_11	0.151415
		0.53352	D3_32	0.0285601
		0.5336	B2_13	0.0478149
		0.53368	C2_44	0.0305257
		0.53376	C2_24	0.0282227
		0.53376	D3_21	0.0334304
		0.53376	C2_22	0.179248
		0.53392	C2_14	0.0403911
		0.53392	E7_43	0.0461699
		0.53392	D2_13	0.0505342
		0.53416	D2_21	0.0359444
		0.53416	D3_14	0.0457239
		0.53416	C3_21	0.0753018
		0.53424	D2_14	0.171401
		0.53424	C3_13	0.0286669
		0.53432	C6_12	0.0376925
		0.53432	D3_13	0.0542194
		0.5344	C3_41	0.0908054
		0.5344	B3_23	0.098294
		0.5344	C3_11	0.0385839
		0.53448	B3_24	0.0491733
		0.53456	E3_13	0.0495341
		0.53456	C3_32	0.0597821
		0.53464	B3_33	0.0445899
		0.53464	D2_42	0.193918
		0.53464	C3_24	0.068178
		0.53472	D2_33	0.0344387
		0.53472	D2_12	0.121687
		0.5348	C2_31	0.0512094
		0.5348	C2_33	0.0463706
		0.5348	D2_34	0.0394232
		0.53488	E2_32	0.0273353
		0.53504	C2_11	0.0754524
		0.53512	D2_11	0.0984166
		0.53512	D2_41	0.0774484
		0.53512	B3_14	0.0904178
		0.53528	D2_44	0.0794075
		0.53544	C2_12	0.0292293
		0.53544	D3_31	0.0811645
		0.53552	C3_14	0.105905
		0.5356	B2_33	0.0522513
		0.5356	B3_21	0.0881783
		0.53568	D3_33	0.0392726
		0.53576	E3_34	0.0567151
		0.53576	B3_11	0.125308
		0.53584	B3_22	0.0542199
		0.53584	C3_42	0.0487732
		0.53592	E2_14	0.0246834
		0.53592	B3_31	0.0790254
		0.536	B2_32	0.0804772
		0.536	C2_22	0.0680421
		0.53608	D3_21	0.231318
		0.53616	D2_13	0.177743
		0.53624	C2_43	0.0660979
		0.53632	B3_34	0.0390728
		0.5364	B3_32	0.0452408
		0.5364	C2_14	0.0338898
		0.53648	D2_21	0.0428521
		0.53648	B3_42	0.0388266
		0.53648	D2_31	0.0389154
		0.53648	D2_14	0.0331298
		0.53656	D3_41	0.0975178
		0.53664	D6_32	0.0406141
		0.53672	D2_43	0.0498674
		0.53672	B3_43	0.044196
		0.5368	E3_13	0.0849325
		0.53688	C3_21	0.0698724
		0.53688	C3_24	0.0654617
		0.53688	E7_24	0.0881157
		0.53696	B3_24	0.0552122
		0.53696	D2_33	0.0486838
		0.53696	D2_12	0.120465
		0.53712	C3_41	0.0557581
		0.5372	C2_33	0.0291792
		0.53736	E3_31	0.0199735
		0.53744	D3_32	0.0229666
		0.53744	B3_14	0.167846
		0.53744	D2_11	0.0801545
		0.53744	D2_34	0.0795015
		0.5376	D3_24	0.0437506
		0.5376	D3_23	0.0351914
		0.53768	C2_12	0.0915243
		0.53784	C3_34	0.0292973
		0.53792	C3_14	0.0579928
		0.538	C2_11	0.0496333
		0.538	B3_11	0.0960671
		0.53808	C3_42	0.0558726
		0.53808	E3_41	0.0279718
		0.53816	D3_22	0.172228
		0.53816	D3_33	0.0279946
		0.53816	D3_13	0.075269
		0.53824	C3_11	0.0448876
		0.53824	C2_31	0.0301625
		0.53824	B3_33	0.0429756
		0.53832	C2_22	0.0609759
		0.53832	D2_41	0.0406168
		0.53832	D3_31	0.124219
		0.5384	D3_21	0.0843704
		0.53848	D3_14	0.0284482
		0.53864	C2_44	0.0495313
		0.53864	C2_14	0.0682815
		0.53872	D2_31	0.0586429
		0.53872	B3_23	0.107295
		0.5388	D3_43	0.0637639
		0.5388	D2_21	0.0565511
		0.5388	D3_41	0.152729
		0.5388	B3_32	0.0425153
		0.53888	B3_42	0.0440393
		0.53904	D2_44	0.0517708
		0.53904	D2_13	0.171151
		0.53904	C2_43	0.0423834
		0.5392	C3_24	0.0977565
		0.5392	C3_32	0.0693015
		0.5392	D2_12	0.130156
		0.53928	C3_13	0.0491195
		0.53936	C3_21	0.0489978
		0.53944	C2_33	0.0543198
		0.5396	D2_14	0.0516623
		0.5396	B7_34	0.0218271
		0.53968	D2_11	0.246444
		0.53968	B3_43	0.157792
		0.53968	B3_14	0.136562
		0.53984	C2_13	0.0362384
		0.53984	D2_42	0.0421528
		0.54	B3_12	0.0535976
		0.54	D3_32	0.0639867
		0.54008	C3_14	0.149676
		0.54016	B3_11	0.106555
		0.54024	D2_32	0.0345922
		0.54024	B3_24	0.0710469
		0.54024	C2_12	0.0355554
		0.54032	D2_34	0.0341197
		0.54032	D3_22	0.046544
		0.54032	D3_13	0.103834
		0.5404	C2_34	0.0291707
		0.54048	D3_31	0.0922419
		0.54056	C2_11	0.0611018
		0.54056	B3_22	0.0370989
		0.54072	D3_21	0.191451
		0.54072	C2_31	0.0393187
		0.54072	E7_34	0.0502912
		0.5408	C3_12	0.0296323
		0.54088	D3_33	0.0473235
		0.54088	E3_41	0.0300355
		0.54104	C2_14	0.0435802
		0.54104	D3_41	0.0698529
		0.5412	B2_22	0.102909
		0.5412	D3_14	0.103788
		0.54136	D2_12	0.190498
		0.54152	D2_21	0.0439756
		0.54152	D2_13	0.0636208
		0.5416	B3_42	0.0469463
		0.5416	D2_41	0.188007
		0.54168	D3_23	0.0445685
		0.54168	C3_41	0.110391
		0.54168	E3_31	0.0335121
		0.54176	D2_14	0.080085
		0.54184	D2_11	0.0458057
		0.54184	B3_14	0.170763
		0.54184	B3_33	0.0587961
		0.54184	B3_43	0.06254
		0.54184	D3_24	0.0503409
		0.54192	C3_33	0.0358164
		0.54192	C3_21	0.0531264
		0.542	C3_24	0.0626902
		0.54208	D2_33	0.110779
		0.54216	B3_31	0.0420786
		0.5424	D3_32	0.0507135
		0.5424	B3_11	0.0926367
		0.54248	B3_21	0.054856
		0.54248	E6_31	0.0374727
		0.54256	D3_22	0.157271
		0.54272	B3_23	0.0893308
		0.54272	B3_12	0.0383602
		0.54272	C3_14	0.08287
		0.5428	C2_33	0.0539702
		0.5428	D2_42	0.0873733
		0.5428	D2_34	0.0515877
		0.5428	C2_13	0.0815172
		0.54288	D3_44	0.0345643
		0.54296	C2_31	0.0445488
		0.54296	E2_24	0.034454
		0.54296	D3_21	0.0910042
		0.54312	B3_24	0.0454456
		0.5432	B3_13	0.0351755
		0.5432	E7_41	0.133596
		0.5432	C2_11	0.0662333
		0.54336	B3_22	0.0695347
		0.54336	C6_42	0.0576455
		0.54344	D2_43	0.16673
		0.54352	D3_14	0.0413723
		0.5436	D3_43	0.047046
		0.54368	D3_13	0.0431151
		0.54368	D3_41	0.116941
		0.54376	D2_13	0.058416
		0.54376	C3_32	0.195961
		0.54384	D3_33	0.237263
		0.54384	D2_41	0.143898
		0.54384	C2_12	0.0680442
		0.54384	B3_42	0.0624597
		0.54392	C2_43	0.0509173
		0.54392	D2_12	0.0313536
		0.544	B7_24	0.0351722
		0.544	D2_14	0.0451217
		0.54408	C2_23	0.0228315
		0.54408	C2_22	0.0637673
[truncated: 169,255 more rows]
