# Supplementary material for: meaRtools: An R package for the analysis of neuronal networks recorded on microelectrode arrays
Source: PLoS Comput Biol. 2018 Oct 1;14(10):e1006506. doi: 10.1371/journal.pcbi.1006506 (PMC6181426; doi:10.1371/journal.pcbi.1006506)
Supplement: S3 Table — (XLSX) [file pcbi.1006506.s004.xlsx]

## Sheet: supplementary table S3
S3 Table
Plate layout file
Project	Experiment Date	Plate SN	DIV	Well	Treatment	Size	Dose	Units
exampleRecording	1012016	plate1	3	A1
exampleRecording	1012016	plate1	3	A2
exampleRecording	1012016	plate1	3	A3
exampleRecording	1012016	plate1	3	A4
exampleRecording	1012016	plate1	3	A5
exampleRecording	1012016	plate1	3	A6
exampleRecording	1012016	plate1	3	A7
exampleRecording	1012016	plate1	3	A8
exampleRecording	1012016	plate1	3	B1
exampleRecording	1012016	plate1	3	B2	treatX
exampleRecording	1012016	plate1	3	B3	treatX
exampleRecording	1012016	plate1	3	B4	untreated
exampleRecording	1012016	plate1	3	B5	untreated
exampleRecording	1012016	plate1	3	B6	treatY
exampleRecording	1012016	plate1	3	B7	treatY
exampleRecording	1012016	plate1	3	B8
exampleRecording	1012016	plate1	3	C1
exampleRecording	1012016	plate1	3	C2	treatX
exampleRecording	1012016	plate1	3	C3	treatX
exampleRecording	1012016	plate1	3	C4	untreated
exampleRecording	1012016	plate1	3	C5	untreated
exampleRecording	1012016	plate1	3	C6	treatY
exampleRecording	1012016	plate1	3	C7	treatY
exampleRecording	1012016	plate1	3	C8
exampleRecording	1012016	plate1	3	D1
exampleRecording	1012016	plate1	3	D2	treatX
exampleRecording	1012016	plate1	3	D3	treatX
exampleRecording	1012016	plate1	3	D4	untreated
exampleRecording	1012016	plate1	3	D5	untreated
exampleRecording	1012016	plate1	3	D6	treatY
exampleRecording	1012016	plate1	3	D7	treatY
exampleRecording	1012016	plate1	3	D8
exampleRecording	1012016	plate1	3	E1
exampleRecording	1012016	plate1	3	E2	treatX
exampleRecording	1012016	plate1	3	E3	treatX
exampleRecording	1012016	plate1	3	E4	untreated
exampleRecording	1012016	plate1	3	E5	untreated
exampleRecording	1012016	plate1	3	E6	treatY
exampleRecording	1012016	plate1	3	E7	treatY
exampleRecording	1012016	plate1	3	E8
exampleRecording	1012016	plate1	3	F1
exampleRecording	1012016	plate1	3	F2
exampleRecording	1012016	plate1	3	F3
exampleRecording	1012016	plate1	3	F4
exampleRecording	1012016	plate1	3	F5
exampleRecording	1012016	plate1	3	F6
exampleRecording	1012016	plate1	3	F7
exampleRecording	1012016	plate1	3	F8
