# Supplementary material for: meaRtools: An R package for the analysis of neuronal networks recorded on microelectrode arrays
Source: PLoS Comput Biol. 2018 Oct 1;14(10):e1006506. doi: 10.1371/journal.pcbi.1006506 (PMC6181426; doi:10.1371/journal.pcbi.1006506)
Supplement: S4 Table — (XLSX) [file pcbi.1006506.s005.xlsx]

## Sheet: supplementary table S4
	S4 Table
	Extracted Features
	Spike features (calculated using function calculate_spike_features)
	Name	Remark
1	nAE	number of active electrodes per well
2	nspikes_by_well	total number of spikes in a well
3	meanfiringrate_by_well	MFR per well
4	meanfiringrate_by_all_ectctordes	MFR for all electrodes (total FR/ 16 or 64 electrodes)
5	meanfiringrate_by_active_electordes	Mean Firing Rate (MFR) for only the active electrodes
6	sdfiringrate_by_active_electordes	standard deviation of MFR for active electrodes
7	meanisis	average Inter Spike Interval per well
8	sdisis	standard deviation of ISI
9	mutual_info (calculated using function calculate_entropy_and_mi)	average well level pairwise mutual information values
10	entropy (calculated using function calculate_entropy_and_mi)	entropy values per well
11	STTC (calculated using function compute_mean_sttc_by_well)	Spike train tiling coeficient per well
	Burst features (calculated using function calculate_burst_features)
1	nAB	number of electrodes with at least 1 burst
2	duration	total recorded time per well (recording time * nAE)
3	mean_dur	average burst duration in seconds
4	mean_freq	average spike frequency for active electrodes per well
5	nbursts	number of bursts per well
6	bursts_per_sec	burst rate (Hz)
7	bursts_per_min	average bursts per minute
8	sd_dur	standard deviation of burst duration
9	mean_freq_in_burst	average spike frequency in bursts (spikes/burst duration)
10	sd_freq_in_burst	standard deviation of spike frequency within bursts
11	mean_ISIs	average Inter-Spike Intervals within bursts
12	sd_ISIs	standard deviation of Inter-Spike Intervals within bursts
13	mean_spikes_in_burst	average number of spikes in bursts
14	sd_spikes_in_burst	standard deviation of number of spikes in bursts
15	total_spikes_in_burst	total number of spikes in bursts
16	per_spikes_in_burst	percentage of spikes participating in bursts
17	mean_IBIs	average Inter-Burst Intervals
18	sd_IBIs	standard deviation of Inter-Burst Intervals
19	cv_IBIs	coefficient of variation of IBI (= mean.IBI/sd.IBI)
	Network spikes features (calculated using function calculate_network_spikes)
1	n	total number of network spikes
2	peak_m	average number of electrodes contributing to network spikes
3	peak_sd	standard deviation of electrodes contributing to network spikes
4	durn_m	average duration of network spikes
5	durn_sd	standard deviation of duration of network spikes
6	percent_of_spikes_in_ns	percentage of spikes participating in network spikes
7	mean_insis	average inter spike inverval within network spikes
8	mean_spikes_in_ns	average number of spikes in network spikes
9	peak_max	max number of electrodes participating in network spike (per well)
10	peak_min	min number of electrodes participating in network spike (per well)
	Network burst features (calculated using function calculate_network_bursts )	Each feature is calculated for three time windows (total of 33 features)
	"d" in feature name represents a division
1	mean_NB_time_per_sec_[window size in ms]	average network burst length
2	total_spikes_in_all_NBs_[window size in ms]	total spikes in network bursts
3	percent_of_spikes_in_NBs_[window size in ms]	percent of spikes in network bursts
4	spike_intensity_[window size in ms]	spike frequency per electrode in network bursts
5	spike_intensity_by_aEs_[window size in ms]	spike frequency for only active electrodes in network bursts
6	total_spikes_in_all_NBs_d_nNB_[window size in ms]	average spikes for all network bursts combined
7	total_spikes_in_all_NBs_d_nNB_d_nAE_[window size in ms]	as above, but divided by number of active electrodes
8	mean_spikes_in_NB_d_nAE_[window size in ms]	spikes per active electrodes, averaged for all network bursts
10	mean_spikes_in_NB_d_nAE_d_NB_duration_[window size in ms]	spikes per active electrodes/ per second, averaged for all network bursts
9	mean_spikes_in_NB_[window size in ms]	average number of spikes in network bursts
11	total_number_of_NBs_[window size in ms]	total number of spikes in network bursts
