# Supplementary material for: meaRtools: An R package for the analysis of neuronal networks recorded on microelectrode arrays
Source: PLoS Comput Biol. 2018 Oct 1;14(10):e1006506. doi: 10.1371/journal.pcbi.1006506 (PMC6181426; doi:10.1371/journal.pcbi.1006506)
Supplement: S5 Table — (XLSX) [file pcbi.1006506.s006.xlsx]

## Sheet: supplementary table S5
S5 Table
output of calc.burst.distributions
Treatment	Well label of the electrode	An examplary normalized histogram of burst duration distributions. A maximum duration of 18 seconds is selected, and 5 bins for each second. Thus, 18*5 bins (90 bins) are represented here
treatX	B2	0	0	0	0	0	0	0	0	0	0	0.0588235	0.0588235	0.176471	0.235294	0.0588235	0	0.117647	0	0.117647	0.117647	0.0588235	0	0	0	0	0	0	0	0	0	0	0	0	0	0	0	0	0	0	0	0	0	0	0	0	0	0	0
treatX	B2	0	0	0	0	0	0	0	0	0	0	0	0.0588235	0.117647	0	0.235294	0.117647	0.176471	0.117647	0	0.0588235	0.117647	0	0	0	0	0	0	0	0	0	0	0	0	0	0	0	0	0	0	0	0	0	0	0	0	0	0	0
treatX	B2	0	0	0	0	0	0.105263	0.0526316	0.0526316	0.105263	0	0.157895	0.157895	0.0526316	0.0526316	0.0526316	0.105263	0	0.105263	0	0	0	0	0	0	0	0	0	0	0	0	0	0	0	0	0	0	0	0	0	0	0	0	0	0	0	0	0	0
treatX	B2	0	0	0	0	0.111111	0.166667	0.444444	0.0555556	0.0555556	0	0.0555556	0.111111	0	0	0	0	0	0	0	0	0	0	0	0	0	0	0	0	0	0	0	0	0	0	0	0	0	0	0	0	0	0	0	0	0	0	0	0
treatX	B2	0	0	0	0	0	0	0	0	0	0	0.0588235	0	0.294118	0.117647	0.294118	0.0588235	0	0	0.117647	0.0588235	0	0	0	0	0	0	0	0	0	0	0	0	0	0	0	0	0	0	0	0	0	0	0	0	0	0	0	0
treatX	B2	0	0	0	0	0	0	0	0	0	0	0	0.0588235	0.176471	0.176471	0.0588235	0.117647	0.117647	0.117647	0.0588235	0	0.117647	0	0	0	0	0	0	0	0	0	0	0	0	0	0	0	0	0	0	0	0	0	0	0	0	0	0	0
treatX	B3	0	0	0	0	0.0625	0.0625	0	0	0	0	0	0	0.0625	0.3125	0.25	0.0625	0.0625	0.0625	0	0.0625	0	0	0	0	0	0	0	0	0	0	0	0	0	0	0	0	0	0	0	0	0	0	0	0	0	0	0	0
treatX	C3	0	0	0	0	0.142857	0.0952381	0.047619	0	0	0	0	0.0952381	0.0952381	0.0952381	0	0	0.047619	0.047619	0	0.0952381	0.190476	0.047619	0	0	0	0	0	0	0	0	0	0	0	0	0	0	0	0	0	0	0	0	0	0	0	0	0	0
treatX	C3	0	0	0	0	0	0	0.0625	0	0	0	0	0.25	0.125	0.1875	0.25	0.125	0	0	0	0	0	0	0	0	0	0	0	0	0	0	0	0	0	0	0	0	0	0	0	0	0	0	0	0	0	0	0	0
treatX	C3	0	0	0	0	0	0	0.0625	0	0	0	0	0	0	0	0.0625	0.4375	0.3125	0.125	0	0	0	0	0	0	0	0	0	0	0	0	0	0	0	0	0	0	0	0	0	0	0	0	0	0	0	0	0	0
treatX	C3	0	0	0	0	0	0.107143	0.178571	0.0714286	0.285714	0.142857	0	0.142857	0	0	0	0	0	0	0.0714286	0	0	0	0	0	0	0	0	0	0	0	0	0	0	0	0	0	0	0	0	0	0	0	0	0	0	0	0	0
treatX	C3	0	0	0	0	0.0625	0	0	0	0	0	0	0	0	0	0.125	0.0625	0.5	0.25	0	0	0	0	0	0	0	0	0	0	0	0	0	0	0	0	0	0	0	0	0	0	0	0	0	0	0	0	0	0
treatX	D2	0	0	0	0	0.117647	0.0588235	0	0.117647	0	0	0	0.0588235	0	0.117647	0.0588235	0	0.0588235	0	0	0	0	0.0588235	0.0588235	0.0588235	0.0588235	0.0588235	0	0.0588235	0.0588235	0	0	0	0	0	0	0	0	0	0	0	0	0	0	0	0	0	0	0
treatX	D2	0	0	0	0	0.176471	0.117647	0	0.117647	0	0	0	0	0	0	0	0	0	0	0	0.0588235	0.0588235	0.0588235	0	0.0588235	0	0	0.0588235	0.117647	0.0588235	0	0	0	0.0588235	0.0588235	0	0	0	0	0	0	0	0	0	0	0	0	0	0
treatX	D2	0	0	0	0	0.25	0.0625	0	0.0625	0	0	0	0	0	0	0	0	0	0.0625	0	0	0.125	0.125	0	0.0625	0	0	0.125	0	0.0625	0	0	0.0625	0	0	0	0	0	0	0	0	0	0	0	0	0	0	0	0
treatX	E2	0	0	0	0	0	0.111111	0.0555556	0.0555556	0.111111	0.0555556	0	0.0555556	0.277778	0.166667	0.0555556	0	0	0.0555556	0	0	0	0	0	0	0	0	0	0	0	0	0	0	0	0	0	0	0	0	0	0	0	0	0	0	0	0	0	0
treatX	E3	0	0	0	0	0	0	0.0588235	0	0.117647	0.0588235	0.117647	0.294118	0.0588235	0.0588235	0.0588235	0	0	0.0588235	0.0588235	0	0	0	0	0	0	0	0.0588235	0	0	0	0	0	0	0	0	0	0	0	0	0	0	0	0	0	0	0	0	0
treatX	E3	0	0	0	0	0.235294	0	0.0588235	0	0.0588235	0	0	0	0.0588235	0	0.0588235	0.117647	0.117647	0.117647	0	0.0588235	0	0.0588235	0	0	0	0	0	0.0588235	0	0	0	0	0	0	0	0	0	0	0	0	0	0	0	0	0	0	0	0
untreated	B4	0	0	0	0	0.363636	0.136364	0.136364	0.0454545	0.0454545	0.0909091	0.0454545	0.0454545	0	0.0909091	0	0	0	0	0	0	0	0	0	0	0	0	0	0	0	0	0	0	0	0	0	0	0	0	0	0	0	0	0	0	0	0	0	0
untreated	B4	0	0	0	0	0.388889	0.111111	0.111111	0.0555556	0	0.111111	0.111111	0.0555556	0	0.0555556	0	0	0	0	0	0	0	0	0	0	0	0	0	0	0	0	0	0	0	0	0	0	0	0	0	0	0	0	0	0	0	0	0	0
untreated	B4	0	0	0	0	0.333333	0.0555556	0.111111	0.111111	0.0555556	0.166667	0.0555556	0.0555556	0	0.0555556	0	0	0	0	0	0	0	0	0	0	0	0	0	0	0	0	0	0	0	0	0	0	0	0	0	0	0	0	0	0	0	0	0	0
untreated	B4	0	0	0	0	0.294118	0.0588235	0.117647	0.0588235	0.117647	0.176471	0.176471	0	0	0	0	0	0	0	0	0	0	0	0	0	0	0	0	0	0	0	0	0	0	0	0	0	0	0	0	0	0	0	0	0	0	0	0	0
untreated	B4	0	0	0	0	0.380952	0.0952381	0.047619	0.047619	0.047619	0.190476	0.047619	0.047619	0	0.0952381	0	0	0	0	0	0	0	0	0	0	0	0	0	0	0	0	0	0	0	0	0	0	0	0	0	0	0	0	0	0	0	0	0	0
untreated	B4	0	0	0	0	0.35	0.15	0	0.1	0	0.2	0.05	0.05	0	0.1	0	0	0	0	0	0	0	0	0	0	0	0	0	0	0	0	0	0	0	0	0	0	0	0	0	0	0	0	0	0	0	0	0	0
treatY	B6	0	0	0	0	0.25	0.166667	0.125	0.0833333	0.0416667	0.0833333	0.0833333	0	0	0.0416667	0	0	0	0	0.0416667	0	0.0416667	0	0	0	0	0	0.0416667	0	0	0	0	0	0	0	0	0	0	0	0	0	0	0	0	0	0	0	0	0
treatY	B6	0	0	0	0	0.227273	0.181818	0.136364	0.0909091	0.0454545	0	0.0909091	0	0.0909091	0.0909091	0.0454545	0	0	0	0	0	0	0	0	0	0	0	0	0	0	0	0	0	0	0	0	0	0	0	0	0	0	0	0	0	0	0	0	0
treatY	B7	0	0	0	0	0.290323	0.290323	0.0645161	0.0645161	0.0322581	0.0322581	0	0	0.0645161	0.0322581	0.0645161	0	0	0	0	0	0	0.0322581	0	0	0	0	0.0322581	0	0	0	0	0	0	0	0	0	0	0	0	0	0	0	0	0	0	0	0	0
treatY	B7	0	0	0	0	0.315789	0.105263	0.0526316	0	0.157895	0.0526316	0.0526316	0	0.0526316	0	0	0.0526316	0	0.105263	0	0.0526316	0	0	0	0	0	0	0	0	0	0	0	0	0	0	0	0	0	0	0	0	0	0	0	0	0	0	0	0
treatY	C6	0	0	0	0	0.0416667	0.0416667	0.0416667	0	0.0416667	0.0833333	0.0833333	0	0.0416667	0	0.0833333	0.0416667	0.0416667	0	0.0833333	0.0833333	0	0	0.0416667	0	0	0	0	0	0.0416667	0	0.0416667	0	0	0	0.0416667	0	0	0	0	0	0	0	0	0	0	0	0	0
treatY	C6	0	0	0	0	0.230769	0.192308	0.0769231	0	0.0384615	0.0384615	0.153846	0.0769231	0.0384615	0.0384615	0.0384615	0	0.0384615	0	0	0	0	0	0	0	0	0	0	0	0	0	0	0	0	0	0	0	0	0	0.0384615	0	0	0	0	0	0	0	0	0
treatY	C6	0	0	0	0	0.05	0.1	0	0.05	0.05	0.05	0.1	0.05	0	0.1	0.05	0	0.05	0.1	0	0	0	0	0	0	0	0.05	0	0	0	0	0	0	0	0	0	0	0	0	0	0	0	0	0	0	0	0.05	0	0
treatY	C6	0	0	0	0	0	0.0526316	0	0	0.0526316	0.0526316	0.157895	0	0.157895	0.0526316	0	0.0526316	0	0	0	0	0.0526316	0	0.0526316	0	0	0	0.0526316	0.0526316	0	0	0	0	0	0.0526316	0	0	0	0	0	0	0	0.0526316	0	0	0	0	0	0
treatY	C6	0	0	0	0	0.0526316	0.0526316	0.105263	0	0	0.0526316	0	0	0.0526316	0	0.105263	0.105263	0	0	0.105263	0.0526316	0.0526316	0.0526316	0	0	0	0	0	0	0	0.0526316	0	0	0	0	0	0	0	0	0	0	0	0	0	0	0	0	0.0526316	0
treatY	C6	0	0	0	0	0	0.117647	0	0	0	0.0588235	0	0.0588235	0	0.0588235	0.176471	0	0	0.0588235	0	0	0.117647	0	0	0	0	0	0.0588235	0	0	0.0588235	0	0	0.0588235	0	0.0588235	0	0	0	0	0	0	0	0	0	0	0	0	0
treatY	D6	0	0	0	0	0.294118	0.176471	0.176471	0.0588235	0.0588235	0.0588235	0	0	0	0	0	0	0	0	0	0.0588235	0	0	0	0	0	0	0	0	0	0	0	0	0	0.0588235	0	0	0	0	0	0	0	0	0	0	0	0	0	0
treatY	D6	0	0	0	0	0.333333	0.222222	0	0.0555556	0	0.0555556	0.0555556	0.0555556	0	0	0	0.0555556	0	0.0555556	0	0	0	0	0	0	0	0	0	0	0	0	0	0	0	0	0	0	0	0	0	0	0	0	0	0	0.0555556	0	0	0
treatY	D7	0	0	0	0	0.130435	0.130435	0.0869565	0.0434783	0	0.0434783	0.0434783	0.0434783	0.0434783	0.0434783	0.0434783	0	0.0434783	0	0	0	0.0434783	0	0	0	0.0434783	0.0434783	0	0.0434783	0.0434783	0	0	0	0	0	0.0434783	0	0	0	0	0	0	0	0	0	0	0.0434783	0	0
treatY	E6	0	0	0	0	0.3	0.15	0.1	0.25	0	0	0	0	0	0	0.05	0	0.05	0	0	0	0	0	0.05	0	0	0	0	0	0	0	0.05	0	0	0	0	0	0	0	0	0	0	0	0	0	0	0	0	0
treatY	E6	0	0	0	0	0.225806	0.258065	0.129032	0.0645161	0.0322581	0.0322581	0.0322581	0.0322581	0	0.0645161	0	0.0322581	0.0322581	0.0322581	0	0	0.0322581	0	0	0	0	0	0	0	0	0	0	0	0	0	0	0	0	0	0	0	0	0	0	0	0	0	0	0
treatY	E6	0	0	0	0	0.290323	0.16129	0.16129	0.0322581	0	0.0322581	0.0967742	0.0322581	0.0322581	0	0.0322581	0	0	0.0322581	0.0322581	0	0.0322581	0	0	0	0	0	0	0	0	0	0	0	0	0	0	0	0	0	0	0	0	0	0	0	0	0	0	0
treatY	E6	0	0	0	0	0.352941	0.176471	0.0588235	0	0.0588235	0	0	0.117647	0	0.0588235	0	0	0	0.0588235	0	0.0588235	0	0	0	0	0	0	0	0	0	0	0	0	0	0	0.0588235	0	0	0	0	0	0	0	0	0	0	0	0	0
treatY	E7	0	0	0	0	0.097561	0.219512	0.268293	0.121951	0.0487805	0.0487805	0	0.0243902	0.0487805	0.0243902	0.0243902	0.0243902	0	0.0243902	0	0	0.0243902	0	0	0	0	0	0	0	0	0	0	0	0	0	0	0	0	0	0	0	0	0	0	0	0	0	0	0
treatY	E7	0	0	0	0	0.419355	0.0645161	0.0322581	0.225806	0.0967742	0.0322581	0	0.0322581	0.0322581	0	0	0	0	0	0.0322581	0	0.0322581	0	0	0	0	0	0	0	0	0	0	0	0	0	0	0	0	0	0	0	0	0	0	0	0	0	0	0
treatY	E7	0	0	0	0	0.0204082	0.163265	0.0816327	0.0816327	0.122449	0.0612245	0.0816327	0.0408163	0.0408163	0	0.0612245	0.0204082	0.0204082	0.0204082	0.0204082	0.0204082	0	0	0.0204082	0.0204082	0.0408163	0.0204082	0	0	0	0	0	0	0	0	0.0204082	0	0	0	0.0204082	0	0	0	0	0	0	0	0	0
treatY	E7	0	0	0	0	0.178571	0.142857	0.178571	0.142857	0.0714286	0.107143	0.0714286	0.0357143	0.0357143	0	0	0	0	0	0	0	0.0357143	0	0	0	0	0	0	0	0	0	0	0	0	0	0	0	0	0	0	0	0	0	0	0	0	0	0	0
treatX	B2	0	0	0	0	0.0416667	0.0416667	0.0416667	0	0	0	0	0.0833333	0.333333	0.0833333	0.0416667	0.0416667	0.125	0.0833333	0.0416667	0.0416667	0	0	0	0	0	0	0	0	0	0	0	0	0	0	0	0	0	0	0	0	0	0	0	0	0	0	0	0
treatX	B2	0	0	0	0	0.0434783	0	0	0	0	0	0	0.0869565	0	0.0869565	0.173913	0.0869565	0.0869565	0.0869565	0.130435	0.0869565	0.0869565	0	0	0.0434783	0	0	0	0	0	0	0	0	0	0	0	0	0	0	0	0	0	0	0	0	0	0	0	0
treatX	B2	0	0	0	0	0.0416667	0.0833333	0.125	0	0.125	0.0416667	0.166667	0.166667	0.0416667	0.166667	0	0.0416667	0	0	0	0	0	0	0	0	0	0	0	0	0	0	0	0	0	0	0	0	0	0	0	0	0	0	0	0	0	0	0	0
treatX	B2	0	0	0	0	0.1	0.05	0.05	0	0.1	0	0.05	0.15	0	0.05	0.1	0.1	0.15	0.05	0	0	0	0	0	0	0	0	0	0	0	0	0	0.05	0	0	0	0	0	0	0	0	0	0	0	0	0	0	0	0
treatX	B2	0	0	0	0	0.047619	0.190476	0.190476	0.142857	0.142857	0.047619	0.047619	0	0.047619	0.047619	0	0	0	0	0	0	0.047619	0.047619	0	0	0	0	0	0	0	0	0	0	0	0	0	0	0	0	0	0	0	0	0	0	0	0	0	0
treatX	B2	0	0	0	0	0	0	0	0	0	0.0909091	0.0454545	0.136364	0.136364	0.272727	0.0454545	0	0.136364	0	0	0	0.0454545	0.0909091	0	0	0	0	0	0	0	0	0	0	0	0	0	0	0	0	0	0	0	0	0	0	0	0	0	0
treatX	B2	0	0	0	0	0	0	0	0	0	0	0.0454545	0.0454545	0.0909091	0.181818	0.0909091	0.0454545	0.136364	0.0909091	0	0.0909091	0	0.0454545	0	0.0454545	0	0	0.0454545	0	0	0	0	0.0454545	0	0	0	0	0	0	0	0	0	0	0	0	0	0	0	0
treatX	B3	0	0	0	0	0	0	0.05	0	0	0	0	0	0.1	0.1	0.05	0.35	0.15	0	0	0	0	0.05	0	0	0	0	0	0.05	0	0	0.05	0	0	0	0	0	0	0	0.05	0	0	0	0	0	0	0	0	0
treatX	B3	0	0	0	0	0	0	0	0	0.05	0	0	0	0	0.05	0.25	0.2	0.05	0.15	0.05	0	0	0.05	0	0	0.05	0	0	0.05	0	0	0	0	0	0	0	0	0	0	0	0.05	0	0	0	0	0	0	0	0
treatX	B3	0	0	0	0	0.047619	0.047619	0.190476	0.333333	0.142857	0.142857	0	0.047619	0	0.047619	0	0	0	0	0	0	0	0	0	0	0	0	0	0	0	0	0	0	0	0	0	0	0	0	0	0	0	0	0	0	0	0	0	0
treatX	B3	0	0	0	0	0.3125	0.4375	0.1875	0	0	0.0625	0	0	0	0	0	0	0	0	0	0	0	0	0	0	0	0	0	0	0	0	0	0	0	0	0	0	0	0	0	0	0	0	0	0	0	0	0	0
treatX	B3	0	0	0	0	0	0	0	0	0	0	0	0	0	0.0555556	0.111111	0.111111	0.388889	0.0555556	0.0555556	0	0	0.0555556	0	0	0	0	0	0	0	0	0	0	0	0	0	0	0	0	0.0555556	0.0555556	0	0	0	0	0.0555556	0	0	0
treatX	B3	0	0	0	0	0.105263	0	0.105263	0.368421	0.157895	0.157895	0.0526316	0	0.0526316	0	0	0	0	0	0	0	0	0	0	0	0	0	0	0	0	0	0	0	0	0	0	0	0	0	0	0	0	0	0	0	0	0	0	0
treatX	B3	0	0	0	0	0.1875	0.25	0.375	0.1875	0	0	0	0	0	0	0	0	0	0	0	0	0	0	0	0	0	0	0	0	0	0	0	0	0	0	0	0	0	0	0	0	0	0	0	0	0	0	0	0
treatX	B3	0	0	0	0	0	0	0.0909091	0.0454545	0.0909091	0	0.0454545	0.136364	0.136364	0.181818	0.0454545	0	0.0909091	0	0	0	0	0.0909091	0	0.0454545	0	0	0	0	0	0	0	0	0	0	0	0	0	0	0	0	0	0	0	0	0	0	0	0
treatX	B3	0	0	0	0	0	0	0.047619	0	0.047619	0.047619	0	0	0.0952381	0.285714	0.142857	0.142857	0	0	0	0	0	0.047619	0	0.047619	0	0.047619	0	0	0.047619	0	0	0	0	0	0	0	0	0	0	0	0	0	0	0	0	0	0	0
treatX	B3	0	0	0	0	0.294118	0.235294	0	0.117647	0.117647	0	0.176471	0	0.0588235	0	0	0	0	0	0	0	0	0	0	0	0	0	0	0	0	0	0	0	0	0	0	0	0	0	0	0	0	0	0	0	0	0	0	0
treatX	B3	0	0	0	0	0.047619	0.047619	0.047619	0.0952381	0.238095	0.238095	0.0952381	0.047619	0	0.047619	0	0	0	0	0	0	0.047619	0.047619	0	0	0	0	0	0	0	0	0	0	0	0	0	0	0	0	0	0	0	0	0	0	0	0	0	0
treatX	C2	0	0	0	0	0.0526316	0.105263	0.0526316	0.210526	0.0526316	0.105263	0.263158	0	0.0526316	0.0526316	0	0	0	0.0526316	0	0	0	0	0	0	0	0	0	0	0	0	0	0	0	0	0	0	0	0	0	0	0	0	0	0	0	0	0	0
treatX	C2	0	0	0	0	0.0555556	0.111111	0.0555556	0	0	0	0.111111	0.222222	0	0.166667	0	0.166667	0	0.0555556	0	0	0.0555556	0	0	0	0	0	0	0	0	0	0	0	0	0	0	0	0	0	0	0	0	0	0	0	0	0	0	0
treatX	C3	0	0	0	0	0.1875	0.125	0.125	0.03125	0.03125	0.03125	0.09375	0.03125	0.09375	0.09375	0	0	0	0	0.0625	0	0.09375	0	0	0	0	0	0	0	0	0	0	0	0	0	0	0	0	0	0	0	0	0	0	0	0	0	0	0
treatX	C3	0	0	0	0	0	0.08	0.12	0.12	0	0	0	0.08	0.2	0.16	0.04	0.16	0	0	0	0.04	0	0	0	0	0	0	0	0	0	0	0	0	0	0	0	0	0	0	0	0	0	0	0	0	0	0	0	0
treatX	C3	0	0	0	0	0.04	0	0.12	0.16	0	0	0	0.04	0	0.04	0.16	0.2	0.16	0.04	0	0.04	0	0	0	0	0	0	0	0	0	0	0	0	0	0	0	0	0	0	0	0	0	0	0	0	0	0	0	0
treatX	C3	0	0	0	0	0.0285714	0.114286	0.114286	0.257143	0.0571429	0.142857	0.0571429	0.0285714	0.0285714	0.0285714	0	0	0.0285714	0.0571429	0.0571429	0	0	0	0	0	0	0	0	0	0	0	0	0	0	0	0	0	0	0	0	0	0	0	0	0	0	0	0	0
treatX	C3	0	0	0	0	0	0.111111	0.185185	0.0740741	0	0.037037	0	0.037037	0	0.0740741	0.111111	0.148148	0.148148	0.037037	0.037037	0	0	0	0	0	0	0	0	0	0	0	0	0	0	0	0	0	0	0	0	0	0	0	0	0	0	0	0	0
treatX	C3	0	0	0	0	0.4	0.24	0.2	0.12	0.04	0	0	0	0	0	0	0	0	0	0	0	0	0	0	0	0	0	0	0	0	0	0	0	0	0	0	0	0	0	0	0	0	0	0	0	0	0	0	0
treatX	C3	0	0	0	0	0.0384615	0.0384615	0.153846	0.115385	0	0	0	0.0384615	0.0384615	0.0384615	0.269231	0.153846	0	0.0384615	0.0384615	0.0384615	0	0	0	0	0	0	0	0	0	0	0	0	0	0	0	0	0	0	0	0	0	0	0	0	0	0	0	0
treatX	C3	0	0	0	0	0	0	0.192308	0.153846	0.0769231	0.0384615	0	0.153846	0.230769	0.0769231	0.0384615	0.0384615	0	0	0	0	0	0	0	0	0	0	0	0	0	0	0	0	0	0	0	0	0	0	0	0	0	0	0	0	0	0	0	0
treatX	C3	0	0	0	0	0.352941	0.235294	0.235294	0.117647	0.0588235	0	0	0	0	0	0	0	0	0	0	0	0	0	0	0	0	0	0	0	0	0	0	0	0	0	0	0	0	0	0	0	0	0	0	0	0	0	0	0
treatX	D2	0	0	0	0	0.227273	0.0454545	0	0	0	0	0	0.0454545	0.0909091	0.0909091	0.0454545	0.136364	0.0454545	0	0	0.0454545	0	0	0.0454545	0	0	0.0454545	0.0454545	0.0454545	0	0	0	0	0	0	0.0454545	0	0	0	0	0	0	0	0	0	0	0	0	0
treatX	D2	0	0	0	0	0.181818	0.0454545	0	0	0.0909091	0	0	0	0	0	0	0.0454545	0.0909091	0	0.0909091	0.0454545	0.0909091	0.0909091	0	0.0454545	0.0454545	0	0	0.0454545	0.0454545	0	0	0	0	0	0	0	0	0	0	0	0.0454545	0	0	0	0	0	0	0
treatX	D2	0	0	0	0	0	0.05	0.1	0	0.05	0.05	0.05	0	0	0	0	0	0	0.05	0.1	0	0	0.05	0	0.05	0.05	0.1	0.05	0.05	0.1	0	0	0	0.05	0	0	0.05	0	0	0	0	0	0	0	0	0	0	0	0
treatX	D2	0	0	0	0	0.125	0	0	0	0.0625	0	0.0625	0.25	0.25	0.0625	0.125	0	0	0	0.0625	0	0	0	0	0	0	0	0	0	0	0	0	0	0	0	0	0	0	0	0	0	0	0	0	0	0	0	0	0
treatX	D2	0	0	0	0	0	0	0.047619	0.047619	0.0952381	0.142857	0.190476	0.047619	0.047619	0.047619	0.0952381	0.142857	0.047619	0	0.047619	0	0	0	0	0	0	0	0	0	0	0	0	0	0	0	0	0	0	0	0	0	0	0	0	0	0	0	0	0
treatX	D2	0	0	0	0	0.125	0	0	0	0.0625	0.375	0.25	0.125	0	0	0.0625	0	0	0	0	0	0	0	0	0	0	0	0	0	0	0	0	0	0	0	0	0	0	0	0	0	0	0	0	0	0	0	0	0
treatX	D2	0	0	0	0	0.157895	0.0526316	0.0526316	0	0	0	0	0.157895	0.105263	0.157895	0.105263	0.0526316	0	0.0526316	0	0.0526316	0	0	0	0	0.0526316	0	0	0	0	0	0	0	0	0	0	0	0	0	0	0	0	0	0	0	0	0	0	0
treatX	D2	0	0	0	0	0.125	0	0	0	0	0	0	0	0	0.1875	0	0.1875	0.25	0.0625	0.125	0	0	0	0	0.0625	0	0	0	0	0	0	0	0	0	0	0	0	0	0	0	0	0	0	0	0	0	0	0	0
treatX	D2	0	0	0	0	0.0555556	0.166667	0	0	0	0	0	0	0	0.0555556	0.166667	0.111111	0.277778	0.0555556	0.0555556	0	0	0	0	0.0555556	0	0	0	0	0	0	0	0	0	0	0	0	0	0	0	0	0	0	0	0	0	0	0	0
treatX	D3	0	0	0	0	0.0625	0	0	0	0	0	0	0	0	0.125	0.1875	0.0625	0.0625	0	0.0625	0	0.0625	0	0	0	0	0	0	0.0625	0.0625	0	0.0625	0.0625	0	0	0.0625	0	0	0	0	0	0	0	0.0625	0	0	0	0	0
treatX	D3	0	0	0	0	0.0526316	0	0	0.105263	0	0.0526316	0	0.0526316	0	0.157895	0.105263	0.105263	0	0.0526316	0	0	0	0	0	0	0.0526316	0	0.157895	0	0	0.0526316	0	0.0526316	0	0	0	0	0	0	0	0	0	0	0	0	0	0	0	0
treatX	D3	0	0	0	0	0.157895	0	0.105263	0.105263	0.157895	0.105263	0.157895	0.0526316	0.0526316	0.0526316	0.0526316	0	0	0	0	0	0	0	0	0	0	0	0	0	0	0	0	0	0	0	0	0	0	0	0	0	0	0	0	0	0	0	0	0
treatX	D3	0	0	0	0	0.0588235	0.117647	0	0.0588235	0	0.176471	0.117647	0.294118	0	0.117647	0.0588235	0	0	0	0	0	0	0	0	0	0	0	0	0	0	0	0	0	0	0	0	0	0	0	0	0	0	0	0	0	0	0	0	0
treatX	D3	0	0	0	0	0	0	0.05	0	0.2	0.05	0.05	0	0.1	0.15	0.2	0	0	0	0	0.05	0	0	0.05	0	0.05	0	0	0.05	0	0	0	0	0	0	0	0	0	0	0	0	0	0	0	0	0	0	0	0
treatX	D3	0	0	0	0	0	0	0.0625	0	0	0.0625	0	0	0	0.125	0.1875	0.0625	0	0	0	0.0625	0	0.0625	0.125	0.0625	0	0	0.1875	0	0	0	0	0	0	0	0	0	0	0	0	0	0	0	0	0	0	0	0	0
treatX	D3	0	0	0	0	0.0555556	0.0555556	0.0555556	0	0.0555556	0	0.0555556	0.0555556	0.0555556	0.277778	0.111111	0	0.0555556	0	0	0	0	0.0555556	0	0	0.0555556	0.0555556	0	0	0	0	0	0	0	0	0	0	0	0	0	0	0	0	0	0	0	0	0	0
treatX	E2	0	0	0	0	0.047619	0	0	0	0.0952381	0.047619	0.142857	0.380952	0.142857	0.047619	0.0952381	0	0	0	0	0	0	0	0	0	0	0	0	0	0	0	0	0	0	0	0	0	0	0	0	0	0	0	0	0	0	0	0	0
treatX	E2	0	0	0	0	0.05	0	0.05	0	0.15	0.15	0.3	0.15	0.05	0.05	0.05	0	0	0	0	0	0	0	0	0	0	0	0	0	0	0	0	0	0	0	0	0	0	0	0	0	0	0	0	0	0	0	0	0
treatX	E2	0	0	0	0	0.0555556	0.111111	0.444444	0.222222	0.166667	0	0	0	0	0	0	0	0	0	0	0	0	0	0	0	0	0	0	0	0	0	0	0	0	0	0	0	0	0	0	0	0	0	0	0	0	0	0	0
treatX	E2	0	0	0	0	0.0869565	0	0.0434783	0.0434783	0	0.0434783	0	0	0	0.0869565	0.0434783	0.0869565	0.217391	0.0434783	0.0869565	0	0.0434783	0.0434783	0	0.0434783	0	0	0.0434783	0	0	0	0	0	0	0	0	0.0434783	0	0	0	0	0	0	0	0	0	0	0	0
treatX	E2	0	0	0	0	0.0909091	0.0909091	0	0	0	0	0.0909091	0.136364	0.181818	0.136364	0.0909091	0.181818	0	0	0	0	0	0	0	0	0	0	0	0	0	0	0	0	0	0	0	0	0	0	0	0	0	0	0	0	0	0	0	0
treatX	E2	0	0	0	0	0.0526316	0	0	0.210526	0.105263	0.315789	0.157895	0.105263	0.0526316	0	0	0	0	0	0	0	0	0	0	0	0	0	0	0	0	0	0	0	0	0	0	0	0	0	0	0	0	0	0	0	0	0	0	0
treatX	E2	0	0	0	0	0.0454545	0.0454545	0	0	0.0909091	0.0909091	0.0454545	0.136364	0.0909091	0.181818	0.181818	0.0454545	0	0.0454545	0	0	0	0	0	0	0	0	0	0	0	0	0	0	0	0	0	0	0	0	0	0	0	0	0	0	0	0	0	0
treatX	E3	0	0	0	0	0.0625	0	0	0.0625	0.25	0.1875	0.25	0.0625	0.0625	0	0.0625	0	0	0	0	0	0	0	0	0	0	0	0	0	0	0	0	0	0	0	0	0	0	0	0	0	0	0	0	0	0	0	0	0
treatX	E3	0	0	0	0	0.0454545	0	0.0909091	0.181818	0	0	0	0	0	0.272727	0.0454545	0.0454545	0.181818	0	0.0454545	0.0909091	0	0	0	0	0	0	0	0	0	0	0	0	0	0	0	0	0	0	0	0	0	0	0	0	0	0	0	0
treatX	E3	0	0	0	0	0.0588235	0	0.0588235	0	0.176471	0.176471	0.235294	0.176471	0	0.117647	0	0	0	0	0	0	0	0	0	0	0	0	0	0	0	0	0	0	0	0	0	0	0	0	0	0	0	0	0	0	0	0	0	0
treatX	E3	0	0	0	0	0	0.0625	0	0.0625	0.0625	0.3125	0.25	0.125	0.125	0	0	0	0	0	0	0	0	0	0	0	0	0	0	0	0	0	0	0	0	0	0	0	0	0	0	0	0	0	0	0	0	0	0	0
treatX	E3	0	0	0	0	0.111111	0.0555556	0	0	0	0.0555556	0	0.0555556	0.166667	0.111111	0.0555556	0	0.111111	0.0555556	0.111111	0.0555556	0.0555556	0	0	0	0	0	0	0	0	0	0	0	0	0	0	0	0	0	0	0	0	0	0	0	0	0	0	0
treatX	E3	0	0	0	0	0.1	0.05	0.05	0	0	0.05	0.05	0.1	0.1	0.05	0	0	0.1	0.05	0.05	0.05	0.1	0	0.05	0	0	0.05	0	0	0	0	0	0	0	0	0	0	0	0	0	0	0	0	0	0	0	0	0	0
treatX	E3	0	0	0	0	0.208333	0.0416667	0	0.125	0	0	0	0	0	0.125	0	0.0416667	0.125	0.125	0.125	0.0416667	0.0416667	0	0	0	0	0	0	0	0	0	0	0	0	0	0	0	0	0	0	0	0	0	0	0	0	0	0	0
untreated	B4	0	0	0	0	0.391304	0.0869565	0.0869565	0.173913	0.0869565	0	0.0434783	0.0434783	0.0434783	0	0.0434783	0	0	0	0	0	0	0	0	0	0	0	0	0	0	0	0	0	0	0	0	0	0	0	0	0	0	0	0	0	0	0	0	0
untreated	B4	0	0	0	0	0.277778	0.0555556	0.222222	0.166667	0.0555556	0.0555556	0.0555556	0.0555556	0.0555556	0	0	0	0	0	0	0	0	0	0	0	0	0	0	0	0	0	0	0	0	0	0	0	0	0	0	0	0	0	0	0	0	0	0	0
untreated	B4	0	0	0	0	0.263158	0.105263	0.157895	0.157895	0.105263	0.0526316	0.0526316	0.0526316	0.0526316	0	0	0	0	0	0	0	0	0	0	0	0	0	0	0	0	0	0	0	0	0	0	0	0	0	0	0	0	0	0	0	0	0	0	0
untreated	B4	0	0	0	0	0.3	0.1	0.15	0.15	0.1	0.05	0.05	0.05	0.05	0	0	0	0	0	0	0	0	0	0	0	0	0	0	0	0	0	0	0	0	0	0	0	0	0	0	0	0	0	0	0	0	0	0	0
untreated	B4	0	0	0	0	0.25	0.1	0.2	0.1	0.15	0.05	0.05	0.05	0.05	0	0	0	0	0	0	0	0	0	0	0	0	0	0	0	0	0	0	0	0	0	0	0	0	0	0	0	0	0	0	0	0	0	0	0
untreated	B4	0	0	0	0	0.333333	0.0555556	0.111111	0.166667	0.166667	0.111111	0.0555556	0	0	0	0	0	0	0	0	0	0	0	0	0	0	0	0	0	0	0	0	0	0	0	0	0	0	0	0	0	0	0	0	0	0	0	0	0
untreated	E5	0	0	0	0	0.0588235	0.117647	0	0.117647	0.0588235	0.176471	0	0	0.0588235	0.0588235	0	0	0	0.176471	0.117647	0	0	0	0.0588235	0	0	0	0	0	0	0	0	0	0	0	0	0	0	0	0	0	0	0	0	0	0	0	0	0
treatY	B6	0	0	0	0	0.0714286	0.25	0.142857	0.214286	0	0	0	0.0357143	0.0357143	0	0.0357143	0	0.0357143	0.0357143	0	0	0	0	0.0357143	0	0.0357143	0	0	0	0	0	0	0	0	0.0357143	0	0	0	0	0	0	0	0	0	0	0	0	0	0
treatY	B6	0	0	0	0	0.1875	0.125	0.0625	0.0625	0.0625	0.0625	0.0625	0.1875	0.125	0	0	0	0	0	0	0	0	0	0	0	0	0.0625	0	0	0	0	0	0	0	0	0	0	0	0	0	0	0	0	0	0	0	0	0	0
treatY	B6	0	0	0	0	0.307692	0.153846	0.0384615	0.153846	0.0769231	0	0.0384615	0.0769231	0	0	0.0769231	0	0	0	0	0	0	0	0	0	0	0.0384615	0	0	0	0	0	0.0384615	0	0	0	0	0	0	0	0	0	0	0	0	0	0	0	0
treatY	B6	0	0	0	0	0.0526316	0.105263	0.315789	0.0526316	0.105263	0.157895	0.105263	0	0	0	0	0	0	0	0	0	0	0.0526316	0.0526316	0	0	0	0	0	0	0	0	0	0	0	0	0	0	0	0	0	0	0	0	0	0	0	0	0
treatY	B7	0	0	0	0	0.441176	0.176471	0.117647	0.0882353	0.0294118	0.0588235	0.0294118	0	0	0.0294118	0	0	0.0294118	0	0	0	0	0	0	0	0	0	0	0	0	0	0	0	0	0	0	0	0	0	0	0	0	0	0	0	0	0	0	0
treatY	B7	0	0	0	0	0.428571	0.25	0.107143	0.0714286	0.0357143	0	0	0	0	0	0.0357143	0	0	0	0	0	0	0.0714286	0	0	0	0	0	0	0	0	0	0	0	0	0	0	0	0	0	0	0	0	0	0	0	0	0	0
treatY	C6	0	0	0	0	0.166667	0.166667	0	0.0555556	0.0555556	0.111111	0	0.0555556	0.111111	0	0.0555556	0	0	0	0.111111	0	0	0	0	0	0	0	0	0	0.0555556	0	0	0	0	0.0555556	0	0	0	0	0	0	0	0	0	0	0	0	0	0
treatY	C6	0	0	0	0	0.0625	0.125	0.0625	0	0	0	0	0	0.0625	0.0625	0.0625	0	0.125	0.0625	0	0	0.0625	0	0.0625	0	0	0	0	0	0	0	0	0	0	0	0.0625	0	0	0	0	0	0	0	0	0	0	0.0625	0	0
treatY	C7	0	0	0	0	0.375	0.25	0.1875	0	0.0625	0	0	0.125	0	0	0	0	0	0	0	0	0	0	0	0	0	0	0	0	0	0	0	0	0	0	0	0	0	0	0	0	0	0	0	0	0	0	0	0
treatY	C7	0	0	0	0	0.411765	0.235294	0.0588235	0.0588235	0.0588235	0	0.0588235	0.0588235	0.0588235	0	0	0	0	0	0	0	0	0	0	0	0	0	0	0	0	0	0	0	0	0	0	0	0	0	0	0	0	0	0	0	0	0	0	0
treatY	D6	0	0	0	0	0.421053	0.210526	0	0	0	0.0526316	0	0	0.0526316	0	0	0.0526316	0	0	0.0526316	0	0	0	0	0	0	0.0526316	0	0	0	0	0	0	0	0	0	0	0	0	0	0	0	0	0	0	0	0	0	0
treatY	D7	0	0	0	0	0.108696	0.152174	0.130435	0.0869565	0.0217391	0.0434783	0.108696	0.0434783	0.0652174	0	0	0	0.0434783	0.0217391	0	0	0.0217391	0	0	0	0.0434783	0	0.0217391	0	0	0	0	0.0217391	0.0217391	0	0	0	0	0	0	0	0.0217391	0	0	0	0	0	0	0
treatY	E6	0	0	0	0	0.137931	0.103448	0.137931	0.0344828	0.0344828	0.0344828	0.0689655	0.103448	0	0.0689655	0	0.0344828	0.0344828	0	0.0689655	0	0.0344828	0	0.0344828	0	0	0.0344828	0	0	0	0	0	0	0	0	0	0	0.0344828	0	0	0	0	0	0	0	0	0	0	0
treatY	E6	0	0	0	0	0.225806	0.129032	0.129032	0.0645161	0.0967742	0.0322581	0.129032	0	0.0322581	0	0	0.0322581	0	0	0	0	0.0645161	0	0	0	0	0	0	0	0	0	0	0	0	0	0	0	0	0	0	0	0	0	0	0	0	0.0322581	0	0
treatY	E6	0	0	0	0	0.210526	0.157895	0.0526316	0.184211	0.105263	0.0263158	0	0.0263158	0	0.0526316	0.0526316	0	0	0	0	0.0263158	0.0263158	0	0	0	0.0263158	0	0	0	0	0	0	0	0	0	0	0	0	0	0	0	0	0	0	0	0	0	0	0
treatY	E6	0	0	0	0	0.15	0.15	0.05	0.05	0.05	0	0.1	0.15	0.1	0	0	0	0.05	0	0	0	0.05	0	0	0	0	0	0	0	0	0	0.05	0	0	0	0	0	0	0.05	0	0	0	0	0	0	0	0	0	0
treatY	E7	0	0	0	0	0.333333	0.285714	0.0952381	0.047619	0.0952381	0	0.0952381	0	0	0.047619	0	0	0	0	0	0	0	0	0	0	0	0	0	0	0	0	0	0	0	0	0	0	0	0	0	0	0	0	0	0	0	0	0	0
treatY	E7	0	0	0	0	0.142857	0.265306	0.244898	0.122449	0.0408163	0.0204082	0.0408163	0	0	0.0612245	0.0204082	0	0	0.0204082	0	0	0.0204082	0	0	0	0	0	0	0	0	0	0	0	0	0	0	0	0	0	0	0	0	0	0	0	0	0	0	0
treatY	E7	0	0	0	0	0.357143	0.238095	0.119048	0.0238095	0.047619	0.0714286	0.0238095	0.047619	0	0	0	0	0	0	0.0238095	0	0	0	0	0.0238095	0	0	0	0	0	0	0	0.0238095	0	0	0	0	0	0	0	0	0	0	0	0	0	0	0	0
treatY	E7	0	0	0	0	0.09375	0.125	0.109375	0.078125	0.078125	0.046875	0.078125	0.015625	0.046875	0.0625	0.03125	0.015625	0.046875	0.015625	0	0.015625	0	0.015625	0	0.015625	0.015625	0	0	0	0.015625	0	0.015625	0.03125	0.015625	0	0	0	0	0	0	0	0	0	0.015625	0	0	0	0	0
treatY	E7	0	0	0	0	0.434783	0.26087	0.0869565	0.0652174	0	0.0869565	0	0.0434783	0.0217391	0	0	0	0	0	0	0	0	0	0	0	0	0	0	0	0	0	0	0	0	0	0	0	0	0	0	0	0	0	0	0	0	0	0	0
[truncated: 42 more columns]
