# Supplementary material for: meaRtools: An R package for the analysis of neuronal networks recorded on microelectrode arrays
Source: PLoS Comput Biol. 2018 Oct 1;14(10):e1006506. doi: 10.1371/journal.pcbi.1006506 (PMC6181426; doi:10.1371/journal.pcbi.1006506)
Supplement: S6 Table — (XLSX) [file pcbi.1006506.s007.xlsx]

## Sheet: supplementary table S6
S6 Table
MEA phenotype of Celf4 KO neurons
		Experiment 1			Experiment 2
	Feature	KO vs WT (DIVs 15-23)	perm.p	MW p.val	KO vs WT (DIVs 15-23)	perm.p	MW p.val
Spikes	MFR by aE	Increased	0.24	0.00354	Increased	0.13	0.00218
	Mutual Info	Increased++	<0.01	7.76e−18	Increased++	<0.01	2.53e−15
	STTC	Increased	0.09	3.77e−06	Increased++	<0.01	1.22e−15
Bursts	mean spike frequencty in burst	Increased++	<0.01	2.61e−24	Increased++	<0.01	6.56e−09
NS	percent of spikes in ns	Increased++	<0.01	2.19e−14	Increased++	0.01	5.57e−06
	total spikes in all NBs 50	Increased++	0.02	1.7e−08	Increased++	0.02	6.32e−06
	percent of spikes in NBs 50	Increased++	<0.01	5.08e−13	Increased++	<0.01	8.92e−06
	total number of NBs 50	Increased++	<0.01	2.86e−14	Increased	0.05	0.0129
